1 **Rearing water microbiomes in white leg shrimp (*Litopenaeus***  
2 ***vannamei*) larviculture assemble stochastically and are influenced**  
3 **by the microbiomes of live feed products**

4 Jasmine Heyse<sup>a</sup>, Ruben Props<sup>a</sup>, Pantipa Kongnuan<sup>b</sup>, Peter De Schryver<sup>b</sup>, Geert Rombaut<sup>b</sup>, Tom  
5 Defoirdt<sup>a</sup>, Nico Boon<sup>a</sup> #

6 <sup>a</sup> Center for Microbial Ecology and Technology (CMET), Department of Biochemical and  
7 Microbial Technology, Ghent University, Coupure Links 653, 9000 Gent, Belgium

8 <sup>b</sup> INVE Technologies NV, Hoogveld 93, 9200 Dendermonde, Belgium

9 **Running title**

10 Source tracking of rearing water bacterioplankton

11 **Keywords**

12 Aquaculture, Source Tracking, *Litopenaeus vannamei*, *Artemia*, Algae, Community Dynamics,  
13 Community Assembly, Microbial Management

14 # Correspondence to: Nico Boon, Ghent University; Faculty of Bioscience Engineering; Centre of  
15 Microbial Ecology and Technology (CMET); Coupure Links 653; B-9000 Gent, Belgium; phone:  
16 +32 (0)9 264 59 76; fax: +32 (0)9 264 62 48; E-mail: [Nico.Boon@UGent.be](mailto:Nico.Boon@UGent.be); Webpage:  
17 [www.cmet.ugent.be](http://www.cmet.ugent.be).

## 18 **Summary**

19 The development of effective management strategies to reduce the occurrence of diseases in  
20 aquaculture is hampered by the limited knowledge on the microbial ecology of these systems.  
21 In this study, the dynamics and dominant community assembly processes in the rearing water  
22 of *Litopenaeus vannamei* larviculture tanks were determined. Additionally, the contribution of  
23 peripheral microbiomes, such as those of live and dry feeds, to the rearing water microbiome  
24 were quantified. The community assembly in the hatchery rearing water over time was  
25 dominated by stochasticity, which explains the observed heterogeneity between replicate  
26 cultivations. The community undergoes two shifts that match with the dynamics of the algal  
27 abundances in the rearing water. Source tracking analysis revealed that 37% of all bacteria in  
28 the hatchery rearing water were either introduced by the live or dry feeds, or during water  
29 exchanges. The contribution of the microbiome from the algae was the largest, followed by that  
30 of the *Artemia*, the exchange water and the dry feeds. Our findings provide fundamental  
31 knowledge on the assembly processes and dynamics of rearing water microbiomes and  
32 illustrate the crucial role of these peripheral microbiomes in maintaining health-promoting  
33 rearing water microbiomes.

## 34 **Originality-Significance Statement**

35 Most studies on rearing water microbiomes are characterized by sampling resolutions of  
36 multiple days and by few replicate cultivations. Through an 18-day sampling campaign in a  
37 *Litopenaeus vannamei* hatchery where five replicate cultivations were studied at a sampling  
38 resolution of one day, we studied the microbiome dynamics in this system. We show that the  
39 community assembly is dominated by stochasticity, which explains the heterogeneity between  
40 replicate cultivations. The dynamics of the algal community in the rearing water induced shifts  
41 in community composition at two different timepoints. Finally, we quantified the

42 contribution of live and dry feed microbiomes to the rearing water community for the first time.  
43 We found that the contribution of each source was dependent on its taxonomic composition,  
44 the bacterial load caused by the addition of this source and the timing of the introduction. These  
45 new insights will aid in the further development of effective microbiome management to reduce  
46 the frequency and magnitude of bacterial diseases.

## 47 **Introduction**

48 Outbreaks of microbial diseases have posed one of the main impediments to the sustainable  
49 growth of the aquaculture industry (Stentiford *et al.*, 2017; Shinn *et al.*, 2018). Complex changes  
50 in the microbial community structure have been hypothesized to be related with disease  
51 outbreaks (Xiong, Zhu, and Zhang, 2014; Lemire *et al.*, 2015; Dai *et al.*, 2020; Huang *et al.*, 2020).  
52 The aquaculture sector is in need of effective microbial management strategies in order to  
53 reduce the occurrence of bacterial diseases. The development and improvement of such  
54 strategies is currently hampered by the limited knowledge of the microbial ecology of these  
55 systems (De Schryver and Vadstein, 2014; Bentzon-tilia *et al.*, 2016).

56 As compared to terrestrial agriculture, aquatic organisms exist in closer relationship with their  
57 surrounding microbiomes (De Schryver and Vadstein, 2014). Numerous molecular studies have  
58 found a link between the microbiome of the host and that of the rearing environment (Chen *et al.*  
59 *et al.*, 2017; Zheng *et al.*, 2017; Sun *et al.*, 2019; Angthong *et al.*, 2020). The cultivated organisms  
60 recruit and enrich specific taxa from their environment (Bakke *et al.*, 2015; Yan *et al.*, 2016; Li  
61 *et al.*, 2017; Xiong *et al.*, 2019; Zhang *et al.*, 2019). For multiple aquatic species, it has been  
62 reported that the larvae-associated microbiomes are more similar to the rearing water  
63 microbiomes as compared to those in the live or dry feed products (Mcintosh *et al.*, 2008; Bakke  
64 *et al.*, 2013; Giatsis *et al.*, 2015). These studies illustrate the importance of the rearing water  
65 microbiome in facilitating host-microbiome interactions.

66 Molecular studies on rearing water microbiomes have shown that the community composition  
67 of these systems is dynamic over time (Xiong, Zhu, Wang, *et al.*, 2014; Zheng *et al.*, 2017; Yan *et al.*  
68 *et al.*, 2020), and exhibits large variability across replicate cultivations (Schmidt *et al.*, 2017; Chun  
69 *et al.*, 2018; Li *et al.*, 2019; Rita *et al.*, 2019; Wiborg *et al.*, 2020). The water microbiome  
70 experiences frequent disturbances through the addition of live and dry feeds, probiotics and

71 water exchanges, each of which carries with them their own microbiome. It remains largely  
72 unknown to what extent the microbial taxa that enter the rearing water can thrive, or even  
73 grow (Vadstein *et al.*, 2018). The feed products and faecal material produced by the animals  
74 cause eutrophication of the water and therefore stimulate bacterial growth (Lucas *et al.*, 2010;  
75 Chen *et al.*, 2017). Zheng *et al.* (2017) suggested that the shift from one live feed product to  
76 another may be responsible for changes observed in the rearing water microbiome, which  
77 illustrates the possibility of outgrowth of bacteria from these sources. Live feeds have been  
78 associated with potential opportunistic pathogens and antibiotic-resistant bacteria (Mcintosh  
79 *et al.*, 2008; Hurtado *et al.*, 2020; Turgay *et al.*, 2020), hence, it is crucial to understand the  
80 contribution of these microbes to the rearing water microbiome. Additionally, the magnitude  
81 and frequency of disturbances, such as nutrient shocks, have been shown to alter community  
82 assembly processes (i.e. stochastic/deterministic balance, Jiang and Patel, 2008; Zhou *et al.*,  
83 2014; Santillan *et al.*, 2018). Consequently, the regime of these disturbances may be an  
84 important driver for the community assembly in the rearing water.

85 Most studies on the rearing water microbiome are characterized by sampling resolutions of one  
86 sample every few days or investigate very few replicate cultivations. Therefore, their resolution  
87 does not allow to unveil the complete microbiome dynamics. Additionally, these studies mostly  
88 investigate either the bacterial community composition or the bacterial densities, but not both.  
89 As has been reported previously, it is crucial to measure both the absolute and relative  
90 abundances of microbial taxa to ensure correct interpretation of survey data (Props *et al.*,  
91 2017). Also in the context of bacterial disease management in aquaculture, absolute  
92 abundances are a crucial factor since virulence of opportunistic pathogens, such as several  
93 *Vibrio*, *Aeromonas* and *Edwardsiella* strains (Henke and Bassler, 2004; Bi *et al.*, 2007; Zhang *et al.*,  
94 2008), can be density dependent through the regulation of virulence factors by quorum  
95 sensing. Additionally, quantification of absolute abundances is important to understand the

96 potential outgrowth of entering micro-organisms, since invader density is an important  
97 predictor for invasion success (Jones *et al.*, 2017; Kinnunen *et al.*, 2018).

98 To be able to effectively steer the microbiomes towards health-promoting, productive  
99 ecosystems, it is imperative to advance our understanding of the assembly, temporal dynamics  
100 and drivers of these microbial communities. We performed a sampling campaign on  
101 *Litopenaeus vannamei* larviculture and studied the extent to which bacterial taxa present in the  
102 rearing water originate from the live and dry feeds or from the exchange water (i.e. sea water  
103 that is used to replace part of the rearing water in order to maintain good water quality). We  
104 further identified drivers of the community dynamics and determined community assembly  
105 processes using an established ecological framework.

106

## 107 **Results**

108 Five replicate *Litopenaeus vannamei* larviculture tanks and all sources that were expected to  
109 contribute to the rearing water microbiome, including dry feeds, *Artemia*, algae and exchange  
110 water, were monitored over 18 days (life stages N5 to PL10, Figure 1). The rearing water was  
111 sampled at a resolution of 3 hours for flow cytometry and once per day for 16S rRNA gene  
112 sequencing. Over the cultivation, tank 1 and 4 reached 100% larval mortality at day 13 and 10,  
113 respectively (Supplementary Figure 1). Only data from before the mortality event was included  
114 for these tanks.

### 115 **Bacterial and algal abundances in the rearing water**

116 At the start of the cultivation, after addition of the larvae to the tanks, the bacterial  
117 concentration in the water was  $4.21 \pm 1.44 \times 10^5$  cells/mL, and algal cell densities were below  
118 the limit of detection (i.e.  $< 10^3$  cells/mL). Over the following days, a consistent increase in  
119 bacterial concentrations was observed for all tanks, reaching an average density of  $2.33 \pm 0.71$   
120  $\times 10^7$  cells/mL on day 7 (Figure 2A). From day 7 on, the patterns of bacterial cell concentrations  
121 started to diverge between the tanks. All tanks experienced a drop in bacterial cell  
122 concentrations, followed by a recovery and further increase. The magnitude and timing of this  
123 decrease and the ensuing cell growth differed between the tanks and led to differences in  
124 bacterial densities of up to 1  $\log_{10}$  unit across the tanks.

125 *Chaetoceros cancitrans* algae were used to feed the larvae over the first 10 days. During this  
126 period, algal densities in the rearing water ranged between  $1.99 \times 10^3$  and  $1.03 \times 10^5$  cells/mL.  
127 After the addition of algae stopped, there was a fast decline in algal densities to below the  
128 detection limit on day 12 (Supplementary Figure 2).

### 129 **Temporal community dynamics**

130 A PCoA ordination of the Bray-Curtis dissimilarity of the bacterioplankton communities  
131 revealed a consistent temporal trend for the replicate tanks (Figure 3 A). A first shift in  
132 community composition was observed from day 2 to day 3 (Figure 2 B, Figure 3 A). Beta-  
133 diversity partitioning revealed that the observed shift was almost completely (> 99.5 %)   
134 attributed to changes in the relative abundances of OTUs that were already present in the  
135 system (i.e. 'abundance variation'), and, thus, not to a large invasion of new taxa (i.e. "turnover",  
136 Supplementary Figure 3). Over this period bacteria were actively growing in the rearing water  
137 and bacterial densities increased on average 2.2 fold (Figure 2A). Together, this indicates that  
138 the observed community shift was caused by a grow-out that gave rise to an enrichment of  
139 specific community members. The OTUs for which there was a sharp increase in relative  
140 abundance belonged to the genera *Phaeodactylibacter* (OTU1), *Marivita* (OTU2), *Donghicola*  
141 (OTU4) and *Pseudoalteromonas* (OTU13 and OTU27). The initial community composition and  
142 dynamics in tank 4 were partly deviating from those of the other tanks (Supplementary Results,  
143 Supplementary Figure 4). During the bacterial grow-out from day 2 to day 3, the deviation of  
144 tank 4 from the other tanks was reduced, as shown by the lowered average Bray-Curtis  
145 dissimilarity between this tank and the other tanks (Figure 3B). The average dissimilarity of  
146 tank 5 as compared to the other tanks increased, and this was mainly caused by the more  
147 pronounced grow-out of *Marivita* sp. in this tank as compared to the other tanks (Figure 2B,  
148 Figure 3B).

149 A second shift established on day 10-11, which corresponded to the final addition of algae as a  
150 live feed and the subsequent steep drop in algal abundances in the rearing water on day 11  
151 (Supplementary Figure 2). The absolute abundances of 39 OTUs were significantly ( $p < 0.001$ )  
152 correlated with the algal densities in the rearing water (Supplementary Table 1). This included  
153 some OTUs that had been dominant over the first half of the cultivation, and belonged to the  
154 genera *Phaeodactylibacter* (OTU1,  $r_p = 0.55$ ), *Balneola* (OTU5,  $r_p = 0.55$ ), *Owenweeksia* (OTU19,



155  $r_p = 0.35$ ), unclassified *Saprospiraceae* (OTU30,  $r_p = 0.36$ ) and unclassified *Rhodobacteraceae*  
156 (OTU6,  $r_p = 0.43$ ). Along with the steep drop in algal abundance, the relative abundance of these  
157 OTUs quickly declined, resulting in the observed community shift. Beta-diversity partitioning  
158 confirmed this observation by attributing only a marginal fraction (0.01 - 1.18 %) of the total  
159 dissimilarity to turnover and attributing most of it to changes in the relative abundances of  
160 resident OTUs (Supplementary Figure 3).

161 Over time, the dissimilarity between the replicate tanks increased (Figure 3B). Along with the  
162 shift in community composition that occurred around day 11, the sharpest increase in the  
163 variability between the replicate tanks was observed (i.e. from day 11 to day 12, Figure 3B).  
164 Afterwards, the inter-tank variability remained high and the dominant community members  
165 differed between the tanks until the end of the cultivation. Beta-diversity partitioning of the  
166 dissimilarities between the tanks revealed that the tanks are mainly composed of the same taxa,  
167 but they differ from one another due to different relative abundances of these taxa (i.e. 0.26 %  
168 turnover on average, Figure 3C).

### 169 **Peripheral microbiomes**

170 Throughout the cultivation, the larvae were fed with different live (algae and *Artemia*) and dry  
171 feed products (Figure 1). To be able to evaluate the influence of these peripheral microbiomes  
172 on the rearing water microbiome, the cell densities and community composition of these  
173 sources were investigated. The microbiomes of the different types of peripheral microbiomes  
174 (i.e. algae, *Artemia*, dry feed and exchange water) were different from the rearing water and  
175 were significantly different from one another ( $r^2 = 0.34$ ,  $p = 0.001$ , PERMANOVA;  
176 Supplementary Figure 5).

177 From day 1 (N5) to day 10 (PL2), *Chaetoceros* algae were cultivated in aerated bioreactors and  
178 used as live feed. Every day, a single bioreactor was used for two feeding-events. Over the days,

179 bacterial densities in these bioreactors differed up to 1 log<sub>10</sub> unit (from 1,30 × 10<sup>6</sup> to 3,28 × 10<sup>7</sup>  
180 cells/mL), and there was a maximum 5 fold-change in bacterial densities between the two  
181 feeding-events from the same bioreactor (Figure 4A). The average Bray-Curtis dissimilarity  
182 between the communities in the bioreactors was 0.78 ± 0.17, indicating a large batch-to-batch-  
183 variability (Supplementary Figure 6). Partitioning of the Bray-Curtis dissimilarity indicated  
184 that most variation was explained by differences in relative abundance of the same set of taxa  
185 (< 99.5%, Supplementary Table 2). Hence, despite the batch differences, 16 core taxa could be  
186 identified (i.e. taxa that were detected in 75% of the samples, Supplementary Table 3).

187 From day 5 to day 18 shrimp larvae were fed with *Artemia*, for which a new batch of cysts was  
188 hatched every 24 hours and stored at 4°C. The starting bacterial density of the batches ranged  
189 from 3.09 × 10<sup>5</sup> cells/mL to 3.89 × 10<sup>6</sup> cells/mL (Figure 4C). During the storage, bacterial  
190 growth was observed daily, which caused a 1.2 to 10 fold increase in bacterial densities. As was  
191 the case for the algae, microbiome composition differed largely between the different batches,  
192 as indicated by the average Bray-Curtis dissimilarity of 0.72 ± 0.17, and beta-diversity  
193 partitioning revealed that these were mainly related to differences in relative abundances of  
194 the taxa that were present (Supplementary Figure 6, Supplementary Table 2). 27 core taxa were  
195 identified (Supplementary Table 4).

196 Five dry feed products were used to feed the larvae throughout the cultivation. Feed product 1  
197 contained a bacterial density of 3.66 × 10<sup>9</sup> cells/g. For the other dry feeds it was not possible to  
198 accurately determine cell densities by flow cytometry (see Supplementary Experimental  
199 Procedures). 16S rRNA gene sequencing provided evidence for the presence of a bacterial  
200 community also in these feeds, as the detected taxa were distinct from the potential kit  
201 contaminants (Supplementary Figure 7). In contrast to the rearing water and other peripheral  
202 microbiomes, the dry feed microbiomes were dominated by Gram-positive taxa  
203 (Supplementary Figure 6). There were large differences between the community composition

204 of the different products, which were mainly due to differences in relative abundances of the  
205 same set of taxa (Supplementary Table 2).

206 Water exchanges were performed every other day (30 - 50% of the tank volume) starting at  
207 day 7. The cell densities in the exchange water ranged from  $1,64 \times 10^4$  to  $4,62 \times 10^5$  cells/mL  
208 (Figure 4B). The community composition between the water batches differed with an average  
209 Bray-Curtis dissimilarity of  $0.83 \pm 0.14$  (Supplementary Table 2). As for the other sources, these  
210 differences were related to differences in the relative abundances of a same set of taxa. Despite  
211 the differences between the exchange water on different days, 16 core taxa could be identified  
212 (Supplementary Table 5).

### 213 **Source tracking**

214 Each source had a different bacterial abundance and was added in a different quantity and with  
215 a different frequency. As such, it introduced different microbial loads to the rearing water  
216 (Supplementary Figure 8). On average, when algae were added, a bacterial load of  $1.22 \times 10^4$   
217 cells/mL/d was added to the rearing water. For the *Artemia* this was  $1.18 \times 10^4$  cells/mL/d, for  
218 the dry feed  $8.42 \times 10^3$  cells/mL/d and for the water exchange  $1.45 \times 10^2$  cells/mL/d. It should  
219 be noted that for the dry feeds this is an underestimation, since we could only determine the  
220 bacterial loads accurately for one feed product (see Experimental Procedures).

221 To investigate to what extent the bacterial taxa detected in the rearing water were associated  
222 with the use of the different feed sources, the absolute OTU loads in the rearing water were  
223 compared with the OTU load introduced through the feeds and exchange water (see  
224 Experimental Procedures for the details on the protocol). This analysis revealed that each of  
225 the investigated sources was responsible for the presence of specific taxa in the rearing water.  
226 In total, 57 introduction events were detected and the presence of 42 out of the 498 rearing  
227 water OTUs could be attributed to the addition of the sources (Figure 5A). Of these OTUs, 26

228 originated from the algal cultures, 15 from the *Artemia*, 6 from the exchange water and 1 from  
229 the dry feed products. Several of the OTUs were associated with multiple sources, either on the  
230 same day (e.g. OTU21, *Winogradskyella*) or on different days (e.g. OTU19, *Owenweeksia* sp.).

231 Remarkably, the introduced OTUs did not belong to the dominant members in the source  
232 microbiomes (i.e. only 7 out of 42 OTUs had an abundance > 5% in the source from which they  
233 were introduced, Figure 5B). Of the 57 events, 49 were classified as a new introduction,  
234 indicating that most of the introduced OTUs were either completely absent in the tank  
235 microbiomes, or they had been present before, but were already reduced to below the detection  
236 limit.

237 Several of the introduced OTUs had a long residence time after their introduction, such as OTU2  
238 (*Marivita* sp.) which remained present until the end of the cultivation after its introduction on  
239 day 1, whereas other OTUs had residence times of only 1 or 2 days (Figure 5C). The relative  
240 abundances of the introduced OTUs in the water could reach up to 60 % (Figure 5D). The initial  
241 fold-change that was caused by the introduction of the OTU within 24 hours after its addition  
242 was not related to the maximal relative abundance or residence time of this OTU in the rearing  
243 water. For example, OTU1 (*Phaeodactylibacter* sp.), which was initially introduced with a  
244 relatively small  $\log_2$ (fold change) of 1.2, remained present in the rearing water for 6 - 13 days  
245 dependent on the tank, and reached relative abundances > 60%. This indicates that even the  
246 OTUs that entered the tanks in a relatively low abundance have the potential to grow out to one  
247 of the most abundant OTUs in the system. In total, the introduced OTUs represented 37 % of  
248 the rearing water community over the entire cultivation.

### 249 **Community assembly in the rearing water**

250 The framework developed by Stegen *et al.* (2013) was used to determine dominant community  
251 assembly processes in the rearing water over time and to assess the assembly processes that

252 were responsible for the introduction of taxa from the sources. The community assembly in the  
253 individual tanks was evaluated through the comparison of the microbiomes on consecutive  
254 days (i.e. day  $i$  to day  $i+1$ ), for each tank separately. For all tanks, the main community drivers  
255 were stochastic processes (i.e. 50 % 'drift acting alone', 36 % 'homogenising dispersal' and 4 %  
256 'dispersal limitation combined with drift'), and the contribution of selective processes was  
257 limited (i.e. 9 % 'homogeneous selection' and 1% of 'variable selection') (Figure 6A,  
258 Supplementary Figure 9).

259 The assembly process that was responsible for the introduction of taxa from the sources was  
260 assessed through comparison of the microbiome in each of the sources to those present in the  
261 rearing water one day after the introduction of the source. In this case, only the presence or  
262 absence of selective forces was evaluated. In light of the introduction of taxa from the external  
263 sources, heterogeneous selection can be interpreted as selection for different properties as  
264 compared to those in the source, while homogeneous selection can be interpreted as selection  
265 for similar bacteria in the rearing water as compared to those present in the source. The  
266 assembly process from the sources differed depending on the source type (Figure 6B). For all  
267 sources except for the dry feed, the assembly was dominated by drift (i.e. no selection in favour  
268 of bacteria from these sources, nor selection against) with a limited contribution of  
269 homogeneous selection (i.e. 4 % for the exchange water, 2 % for the *Artemia* and 17 % for the  
270 algae). For the dry feed the assembly was 61 % governed by variable selection.

## 271 Discussion

### 272 Algal populations steer the bacterioplankton dynamics

273 To obtain microbial control of aquaculture systems it is paramount to understand the drivers  
274 of community composition and dynamics (Bentzon-tilia *et al.*, 2016). Our data indicated that  
275 the communities were continuously changing and that two major shifts occurred (i.e. on day 2  
276 and day 10-11), which were linked to the dynamics of the algal cell densities in the rearing  
277 water. The first shift was caused by a rapid grow-out of specific bacterial taxa. There are two  
278 possible explanations for this dynamic: an enrichment of bacteria that grow fast on feed and  
279 faecal material which accumulates in the tank (De Schryver and Vadstein, 2014; Chen *et al.*,  
280 2017) or of bacteria that can grow effectively on algal exudates, given the sharp increase in algal  
281 densities (Natrah *et al.*, 2014; Mühlenbruch and Grossart, 2018). After this shift the  
282 communities were dominated by taxa of which the absolute abundance was significantly  
283 correlated with the algal densities (Supplementary Table 1). This supports the hypothesis of  
284 outgrowth by algae-associated bacterial taxa. The shift caused an enrichment of the same taxa  
285 in all replicate tanks which synchronised the community composition across the tanks (Figure  
286 3B). This can be explained by the community assembly being dominated by homogenous  
287 selection and dispersal limitation, two processes that reduce compositional turnover  
288 (Supplementary Figure 9). Algal feeding stopped after ten days which caused a decrease in algal  
289 abundance, followed by a decrease in the abundance of algae-associated bacterial taxa. This  
290 initiated the second community shift that further increased the divergence in community  
291 composition between the replicate tanks.

292 Phytoplankton is known to steer bacterial communities (Pinhassi *et al.*, 2004; Teeling *et al.*,  
293 2016; Park *et al.*, 2020). Tang *et al.* (2020) compared cultivations with live and powdered algae  
294 and showed that the algae actively modulated the rearing water microbiomes and increased

295 cultivation performance. This principle is widely adopted as the ‘green water technology’,  
296 where the presence of algae in rearing water is promoted to improve cultivation performance  
297 (Corre et al., 2005; Neori, 2011; Charoonnart and Purton, 2018). The bacterioplankton may be  
298 steered by the phytoplankton through different mechanisms. On the one hand, the  
299 phytoplankton can compete with bacteria for space and nutrients, and, as such, reduce the  
300 outgrowth of bacteria (Mills *et al.*, 2008; Fourquez *et al.*, 2015). On the other hand, the  
301 phytoplankton can interact with and promote specific taxa, as was observed in our study. This  
302 interaction can take place through the production of algal exudates that may serve as resources  
303 for growth (Smriga *et al.*, 2016) or have inhibitory properties (Molina-cárdenas and Sánchez-  
304 saavedra, 2017) for specific taxa.

305 During the cultivation the rearing water is eutrofied which has been shown to increase  
306 stochasticity in community assembly and to disturb community stability (Yang *et al.*, 2018). Our  
307 results indicate that the presence of the phytoplankton community was associated with the  
308 presence of specific bacterial taxa and, as such, stabilised the community composition over the  
309 replicates. This stabilising effect is in accordance with the study of (Yang *et al.*, 2020) which  
310 showed that different types of phytoplankton influence the rate at which community change  
311 over time, and that this is dependent on the type of algae that were used. However, it should be  
312 noted that even though the phytoplankton reduced divergence between the replicate tanks, this  
313 did not prevent mass mortality occurring in one of the tanks while algae were abundant in the  
314 rearing water (i.e. tank 4). Further research regarding the algae-bacteria interactions in healthy  
315 and diseased systems is needed to determine how phytoplankton can be used effectively to  
316 steer the rearing water microbiomes towards health-promoting states.

317 These findings further demonstrate the important role of phytoplankton as a steering factor of  
318 aquaculture microbiomes and indicate that management of the stability of the phytoplankton

319 community and its bacterial associates in the rearing water is of great interest during  
320 cultivation.

### 321 **Rearing water community assembly is dominated by stochasticity**

322 Understanding community assembly processes is imperative to allow the development of  
323 effective microbiome management strategies. For example, it can enhance the predictability of  
324 factors that determine the establishment of introduced bacteria, such as probiotics (Dini-  
325 andreote and Raaijmakers, 2018; Pearson *et al.*, 2018), and it may aid in determining optimal  
326 process monitoring regimes.

327 Beta-diversity analysis revealed that the rearing water community composition gradually  
328 changes over time (Figure 3A, Supplementary Figure 3), and that through these changes the  
329 microbiomes of the replicate tanks increasingly diverged from one another (Figure 3B). The  
330 taxa that were present in the replicate tanks were similar, but the relative abundances at which  
331 they were present were highly differing (Figure 3C). The community assembly assessment  
332 revealed that the temporal dynamics in the rearing water communities are mainly governed by  
333 stochastic processes (Figure 6A), which can explain the observed heterogeneity. This  
334 stochasticity implies that these larviculture system dynamics are largely unpredictable (Zhou  
335 and Ning, 2017) and hence they necessitate continuous monitoring.

336 Divergence between replicates, such as observed in our study, is a frequently observed  
337 phenomenon (Schmidt *et al.*, 2017; Chun *et al.*, 2018; Li *et al.*, 2019; Rita *et al.*, 2019; Wiborg *et*  
338 *al.*, 2020). Hence, stochastic assembly may be a widespread characteristic aquaculture systems.  
339 However, community assembly may depend on the type of rearing system as this determines  
340 operational characteristics such as water exchanges/recirculation, feeding frequency, etc.  
341 Further research is needed to test the generalisability of our observation.



342 Not only community composition, but also bacterial densities diverged between the replicate  
343 tanks, causing the larvae in replicate tanks to be exposed to different bacterial taxa at different  
344 bacterial loads. Given the well-documented link between host and rearing water microbiomes  
345 (Zheng *et al.*, 2017; Sun *et al.*, 2019; Anghong *et al.*, 2020), this heterogeneity may have its  
346 implications on the reproducibility of cultivation performance. In fact, high mortality and low  
347 reproducibility between replicate cultivations are commonly observed in hatcheries (Vestrum  
348 *et al.*, 2018). However, it should be noted that the cultivated organisms can select for specific  
349 taxa from their environment (Yan *et al.*, 2016; Li *et al.*, 2017; Dai *et al.*, 2020), and the exact  
350 implications of rearing water community heterogeneity on the reproducibility of cultivation  
351 performance remains to be elucidated.

### 352 **Peripheral microbiomes are characterised by batch-differences**

353 A hatchery consists of several microbial compartments, including the water column, the larvae,  
354 the larval feed, etc. (Goulden *et al.*, 2013). Most studies have focussed on the rearing water and  
355 host-associated microbiomes, but did not simultaneously investigate the community  
356 composition of these peripheral microbiomes. Even though they are recognised as an important  
357 factor for biosecurity (Høj *et al.*, 2009), limited information is available about batch-variability,  
358 bacterial dynamics under storage conditions, etc., in commercial hatcheries.

359 For each of the peripheral microbiomes a high batch-to-batch variability was observed. These  
360 batch-differences were mainly attributed to large differences in the relative abundances of  
361 members within a same set of taxa (Supplementary Table 2), and each source was associated  
362 with a typical set of “core” taxa (Supplementary Figure 6). Also in terms of bacterial densities,  
363 a high variability between and within batches was observed (Figure 4).

364 The presence of a core set of bacteria in the algal cultures is in accordance with the previously  
365 reported specificity of algae-associated microbiomes (Goecke *et al.*, 2013; Behringer *et al.*,

366 2018; Fulbright *et al.*, 2018; Mönnich *et al.*, 2020) (Supplementary Table 3). Many of the taxa  
367 that were identified as core members of the algal cultures have been reported to be associated  
368 with *Chaetoceros* sp., including *Phaeodactylibacter*, *Neptuniibacter*, *Arthrobacter*, *Marinobacter*,  
369 *Alteromonas*, *Rhodobacteriaceae*, *Aestuariibacter*, *Marinobacter* (Baker *et al.*, 2016; Crenn *et al.*,  
370 2018; Angthong *et al.*, 2020).

371 For *Artemia*, the taxa that were identified as core members have been previously observed in  
372 this system, including *Alteromonas*, *Vibrio*, *Nautella*, *Donghicola*, *Halomonas* and  
373 *Rhodobacteriaceae* (Mcintosh *et al.*, 2008; Tkavc *et al.*, 2011; Walburn *et al.*, 2019; Angthong *et*  
374 *al.*, 2020) (Supplementary Table 4). The core microbiome of the *Artemia* storage water  
375 harboured several taxa that were classified as *Vibrio* sp., however, due to the limitation of 16S  
376 rRNA sequencing we cannot determine whether these bacteria are of concern for the shrimp  
377 health in this experiment. This is in accordance with previous studies that reported members  
378 of the *Vibrio* genus naturally occur in *Artemia*-associated microbiomes (Lopez-Torres and  
379 Lizarraga-Partida, 2001; Thompson *et al.*, 2004; Høj *et al.*, 2009; Tkavc *et al.*, 2011;  
380 Interaminense *et al.*, 2014). Over the course of 24 hours, bacterial growth which caused up to 1  
381 log<sub>10</sub>-unit differences in bacterial densities was observed. Hence, the storage conditions did not  
382 suppress bacterial growth. This illustrates that rigorous temperature control is key for bacterial  
383 control. The last time point of every batch was sampled for Illumina sequencing, therefore we  
384 can make no claims as to which bacterial taxa were growing during the cold storage.

385 Microbiomes of formulated dry feeds are studied less as compared to those of the live feeds. In  
386 our study, the microbiomes of the five dry feed products were dominated by Gram-positive  
387 bacteria (**Error! Reference source not found.**), which is in correspondence with a previous  
388 report (Giatsis *et al.*, 2015). Some of the families and genera that were detected in the feeds  
389 have previously been found in dry feed microbiomes, such as *Bacillaceae* and *Lactobacilli*  
390 (Lunestad *et al.*, 2007; Walburn *et al.*, 2019). Feed ingredients, such as processed cell-derived

391 materials, may harbour residual and/or background microbiota and are increasingly used as  
392 alternative protein sources for feed production (Cottrell et al., 2020). It is therefore important  
393 to note that the bacterial loads measured in this study can comprise viable and/or non-viable  
394 cells, and that additional physiological analyses are necessary to verify this. Previous studies  
395 have shown these aspects to be affected by environmental parameters as well as on-site  
396 handling and usage (Lunestad et al., 2007; O'Keefe and Campabadal, 2015; Walburn et al.,  
397 2019). Given the limited research effort towards dry feed microbiomes, further research should  
398 elucidate on the functionalities and in situ activity bacteria in dry.

399 Our data indicated that microbiomes of dry and live feeds as well as exchange water are  
400 characterised by large variability, both within and between batches, and hence increased  
401 control of their microbiome may contribute to more predictable larviculture production.

#### 402 **External sources contribute differently to the rearing water microbiome**

403 The rearing water receives frequent bacterial inputs through the addition of live and dry feeds  
404 and water exchanges, each of which can contribute to the rearing water microbiome. Several  
405 authors have hypothesised that the presence of specific taxa in the rearing water was caused  
406 by the addition of these inputs (Zheng *et al.*, 2017; Walburn *et al.*, 2019; Angthong *et al.*, 2020).  
407 Nonetheless, the relative importance of each of these inputs for the rearing water community  
408 had not yet been quantified (Vadstein *et al.*, 2018).

409 Our source tracking analysis revealed that the microbiomes of all external sources (algae,  
410 *Artemia*, dry feeds and exchange water) contributed to the rearing water microbiome, and that  
411  $\pm 10\%$  of the rearing water OTUs (i.e. 42 out of the 498) were introduced through these sources  
412 (Figure 5A). Together, these OTUs were responsible for 37% of the rearing water community  
413 over the entire cultivation. The contribution of the different sources in terms of the number of  
414 introduced OTUs, residence time and relative abundances in the rearing water, greatly differed

415 between the sources, with the biggest contribution by the algae, followed by the *Artemia*, the  
416 exchange water and the dry feeds (Figure 5).

417 The addition of *Artemia* and algae caused similar bacterial loads to the rearing water  
418 (Supplementary Figure 8). However, the number of OTUs that were introduced through the  
419 algae was higher as compared to those of the *Artemia* (i.e. 26 vs. 15) and the residence times  
420 and relative abundances that were obtained by the algae-associated OTUs were higher (Figure  
421 5). This can partly be explained by the fact that the rearing water conditions more frequently  
422 favoured the selection of bacteria from the algal cultures as compared to those of the *Artemia*  
423 (Figure 6B). Another explanation for the higher contribution of the algae may be that the  
424 algae were added from the start of the cultivation, while the *Artemia* addition only started later  
425 (Figure 1). At the start-up, the rearing water was partly disinfected and the bacterial abundance  
426 was expected to be below the carrying capacity (De Schryver and Vadstein, 2014). Over the  
427 following days feed products and faecal excrements accumulated in the rearing water which  
428 caused a gradual eutrophication and bacterial growth (Payne *et al.*, 2006), therefore the  
429 nutrient availability per cell may have been higher during the introduction of the algae-  
430 associated bacteria as compared to those of the *Artemia*. Invasion research has shown that the  
431 availability of nutrients is one of the main factors affecting the susceptibility of communities to  
432 invasion (Eisenhauer *et al.*, 2013; Mallon *et al.*, 2015).

433 Even though cells were detected in one of the dry feeds using flow cytometry, the dry feeds had  
434 the lowest overall contribution to the rearing water, which is in accordance with a study of  
435 Giatsis *et al.* (2015). This can be explained by a combination of selection against the feed  
436 community members (Figure 6B) and the lower bacterial load towards the rearing water as  
437 compared to the live feeds. In addition, the dry feed microbiomes may contain a large fraction  
438 of non-viable cells, as discussed previously. Despite the large volumetric contribution of the  
439 exchange water (i.e. 30 – 50 % of the tank volume), only 6 OTUs were introduced. This can be

440 explained by the low bacterial densities in these exchange waters (2 log<sub>10</sub>-units lower as  
441 compared to the live feeds).

442 Interestingly, the algae were responsible for the introduction of several taxa that correlated  
443 with the algal abundances in the rearing water over the first half of the cultivation (i.e.  
444 *Phaeodactylibacter* sp., *Marvita* sp. and *Owenweeksia* sp.), and in that way contributed to the  
445 observed stabilising effect by the algae-associated bacterial community. On the other hand, the  
446 introduced OTUs also included taxonomic groups that are identified as biomarkers for bad  
447 shrimp performance (i.e. *Vibrionaceae* sp., originating from the *Artemia*). This illustrates that to  
448 maintain health-promoting microbiomes in the rearing water, proper management of the  
449 peripheral microbiomes is essential.

450 Overall, these results illustrate that the peripheral microbiomes have an important  
451 contribution to the rearing water microbiome. Given this contribution, careful preparation and  
452 storage of these inputs will be paramount to maintain stable, healthy systems. The contribution  
453 of each source was dependent on its taxonomic composition, the bacterial load that originated  
454 from this source and on the timing of the introduction. Based on this study, the hygiene of the  
455 live feed microbiomes should be prioritised as compared to those of dry feeds and exchange  
456 water. However, bacterial fluxes can differ dependent on the setup (i.e. cultivation method,  
457 disinfection procedures, etc.) (Vadstein *et al.*, 2018).

## 458 **Conclusions**

459 In this study, we quantified the importance of live and dry feed, and exchange water to the  
460 microbial community composition of rearing water in *L. vannamei* larviculture. Together these  
461 inputs were responsible for 37 % of all bacteria to which the larvae were exposed during the  
462 cultivation. The contribution of each source was dependent on its taxonomic composition, the  
463 bacterial load caused by the addition of this source and the timing of the introduction. We

464 showed that the temporal community assembly in the rearing water is mainly governed by  
465 stochasticity, which corroborates previously documented variable community composition  
466 and cultivation performance among replicate cultivations. Additionally, the dynamics of the  
467 algal population in the rearing water induced shifts in the bacterial community composition.  
468 Our findings provide fundamental knowledge on the sources and assembly processes of the  
469 aquaculture microbiome which may aid in the development of effective microbiome  
470 management to mitigate bacterial diseases and maintain a health-promoting rearing water  
471 environment.

## 472 **Experimental procedures**

### 473 **Rearing of the shrimp larvae**

474 The cultivation of *L. vannamei* larvae was performed in five replicate tanks over 18 days (life  
475 stages zoea N5 to PL10). The larvae were cultivated indoors, in aerated, 175 L tanks. The five  
476 experimental tanks were randomised between other tanks in the facility. Over the course of the  
477 cultivation, the larvae were fed every three hours with live and/or dry feed. A range of live and  
478 dry feed products were used (Figure 1). From day 5 till day 10, heat-killed (i.e. submerged in  
479 boiled water until they are no longer moving) *Artemia* were used as live feed. From day 5 on,  
480 live *Artemia* were used. From day 1 to day 10 the larvae were supplemented with *Chaetoceros*  
481 *calcitrans* algae, twice per day. In total, five dry feed products were used, which are labelled as  
482 feeds 1 to 5. There was no additional supplementation of antibiotics or commercial probiotics.

483 Approximately every two days, the physicochemical water quality was assessed tanks  
484 (Supplementary Table 6). In order to maintain good water quality, a water exchange between  
485 30 and 50% of the tank volume was performed every other day from day 7 onwards. Larval  
486 health was assessed though daily visual inspection (Supplementary Figure 1). Two tanks  
487 reached 100% larval mortality during the cultivation (i.e. T4 at day 10 and T1 at day 13).

### 488 **Rearing of the live feeds**

489 Algae were cultivated on F2 medium in transparent, aerated bioreactors. Every day a single  
490 bioreactor was used to feed the larvae tanks twice (i.e. at 8 a.m. and 5 p.m). Afterwards, the tank  
491 was rinsed and cleaned using Sanocare PUR (INVE Aquaculture), according to the  
492 manufacturer's instructions. and refilled to start a new culture.

493 Every day a new batch of *Artemia* cysts was hatched according to the manufacturer's  
494 instructions. After 20 hours the nauplii were transferred to a refrigerator and stored with

495 aeration at 4°C, to be used as a live feed for the shrimp larvae over the next 24 hours. Every  
496 batch was prepared in order to be used from 11 a.m. on the first day until 8 a.m. the following  
497 day. Afterwards, the tank was rinsed and cleaned using Sanocare PUR (INVE Aquaculture),  
498 according to the manufacturer's instructions.

## 499 **Sampling**

500 Water samples of 1 mL were collected for flow cytometry below the surface of the larviculture  
501 tanks before and after every feeding event (i.e. resolution of 3 hours). Since the bacterial load  
502 that is added through the feeding is low as compared to the bacterial load that is already present  
503 in the tank (i.e. for the algae the daily introduced load is 0.07% of the average bacterial density  
504 in the rearing water, and 0.07%, 0.05% and 0.0008% for *Artemia*, dry feed and exchange water,  
505 respectively), the direct effect of feeding is negligible and the measurement before and after  
506 each feeding event can be treated as replicates (i.e. average and median differences in bacterial  
507 load before and after feeding are 0.44% and -0.34%, respectively). The water of the *Artemia*  
508 storage tanks were sampled at every feeding event, using a sieve to ensure no *Artemia* were  
509 included in the sample. The algae bioreactors were sampled, when the algae were added to the  
510 cultivation tanks (i.e. twice per day). Samples from the exchange water were taken at every  
511 water exchange. All samples for flow cytometry were fixed with 5 µl glutaraldehyde (20%,  
512 vol/vol) per mL and stored at 4°C prior to transport. All samples were shipped to Belgium on  
513 dry ice for lab analysis.

514 On day 1 the larvae were added to the water in the evening, and the 1 mL samples for 16S rRNA  
515 sequencing that are labelled as "day 1" were taken a few minutes later. For all subsequent days,  
516 the sample of the rearing tanks for sequencing was taken every morning, *Artemia* storage and  
517 algae bioreactors were sampled for sequencing at the same time. A sample from the exchange  
518 water was taken at every water exchange. All dry feeds were samples once. The sequencing



519 samples were stored at -20°C prior to transport. All samples were shipped to Belgium on dry  
520 ice for lab analysis.

### 521 **Flow cytometry**

522 Prior to FCM analysis, batches of samples were defrosted, acclimated to room temperature and  
523 diluted tenfold in sterile, 0.22 µm-filtered Instant Ocean® solution (35 g/L, Aquarium Systems,  
524 US). Samples were stained with 1 vol% SYBR® Green I (SG, 100x concentrate in 0.22 µm-filtered  
525 DMSO, Invitrogen) and incubated in the dark at 37°C for 20 min. They were analysed  
526 immediately after incubation on a BD Accuri C6 Plus cytometer (BD Biosciences, Erembodegem,  
527 Belgium) which was equipped with four fluorescence detectors (533/30 nm, 585/40 nm, > 670  
528 nm and 675/25 nm), two scatter detectors and a 20-mW 488-nm laser. Samples were analysed  
529 in fixed volume mode (30 µl). The flow cytometer was operated with Milli-Q water  
530 (MerckMillipore, Belgium) as sheath fluid and instrument performance was verified daily using  
531 CS&T RUO Beads (BD Biosciences, Erembodegem, Belgium). For the feed samples a modified  
532 protocol was used (see Supplementary Experimental Procedures).

533 A subset of 553 samples was measured on-site, immediately after sampling and prior to  
534 fixation, on an Accuri C6 (BD Biosciences, Bangkok, Thailand), in order to verify the reliability  
535 of the fixation protocol. Pearson correlation between the bacterial and algal densities in  
536 samples that were measured fresh (on-site) and fixed (off-site) were 0.9 and 0.9, respectively  
537 (Supplementary Figure 11).

### 538 **Illumina sequencing**

539 The 1 mL aliquots for DNA extraction were defrosted and pelleted (25 min, 18,200 g, 4 °C). DNA  
540 was extracted immediately from the pellet using the ZymoBIOMICS DNA Microprep Kit (Zymo  
541 Research, USA). The genomic DNA extract (10 µL) was send out to BaseClear B.V. (Leiden, the

542 Netherlands) for library preparation and sequencing. When algal abundances are high, the 16S  
543 sequences originating from chloroplast DNA can make up large portions of the obtained  
544 sequences. Because of the presence of the algal populations in part of the samples, PCR clamps  
545 were used to block chloroplast amplification and direct the sequencing effort to the bacterial  
546 population (Lundberg *et al.*, 2013). Amplicon sequencing of the V3–V4 hypervariable region of  
547 the 16S rRNA gene was performed on an Illumina MiSeq platform with v3 chemistry, and the  
548 primers 341F (5'-CCT ACG GGN GGC WGC AG -3') and 785Rmod (5'-GAC TAC HVG GGT ATC TAA  
549 KCC-3'). Extra samples, including a dilution series of a mock community and a blank, were  
550 included as quality controls (see Supplementary Experimental Procedures).

## 551 **Data analysis**

### 552 **Flow cytometry analysis**

553 The flow cytometry data were imported in R (v3.6.3) (R Core Team, 2017) using the flowCore  
554 package (v1.52.1) (Hahne *et al.*, 2009). The data were transformed using the arcsine hyperbolic  
555 function, and the background was removed by manually creating a gate on the primary  
556 fluorescent channels. Bacterial and algal populations were separable based on their  
557 fluorescence patterns (Supplementary Figure 11). Hammes *et al.* (2008) determined a  
558 quantification limit of 100 cells/mL. Since all samples were diluted 10 times, a quantification  
559 limit of  $10^3$  cells/mL was used.

### 560 **16S rRNA gene amplicon sequencing analysis**

561 Analysis of the amplicon data was performed with MOTHUR (v.1.42.3) (Schloss *et al.*, 2009).  
562 Contigs were created by merging paired-end reads based on the Phred quality score heuristic  
563 and were aligned to the SILVA v123 database. Sequences that did not correspond to the V3–V4  
564 region as well as sequences that contained ambiguous bases or more than 12 homopolymers,

565 were removed. The aligned sequences were filtered and sequencing errors were removed using  
566 the pre.cluster command. UCHIME was used to removed chimeras (Edgar *et al.*, 2011) and the  
567 sequences were clustered in OTUs with 97% similarity with the cluster.split command (average  
568 neighbour algorithm). OTUs were subsequently classified using the SILVA v123 database.

569 The OTU table was further analysed in R (v3.6.3) (R Core Team, 2017). OTU abundances were  
570 rescaled by calculating their proportions and multiplying them by the minimum sample size  
571 present in the data set. Alpha- and beta-diversities were evaluated using the phyloseq  
572 (Mcmurdie and Holmes, 2013) (v1.30.0) and vegan (Oksanen *et al.*, 2019) (v2.5-6) packages,  
573 respectively. Bray-Curtis dissimilarities were partitioned into turnover and abundance  
574 variation, using the betapart package (v1.5.1) (Baselga and Orme, 2012). Differences between  
575 groups in the beta diversity analysis were evaluated by means of permutational multivariate  
576 ANOVA (PERMANOVA, 999 permutations) of the Bray-Curtis dissimilarity matrix, after  
577 confirmation of the homogeneity of the variance in the groups. Core microbiome members were  
578 determined using the microbiome package (v1.8.0) (Lahti and Shetty, 2019). The prevalence-  
579 threshold that was used for detecting core members was 0.75 (i.e. taxa that were detected in  
580 75% of the samples were considered members of the core). Absolute OTU abundances were  
581 calculated based on the bacterial densities as determined though flow cytometry.

## 582 **Source tracking**

583 For each day  $i$ , the absolute abundance of the OTUs in the rearing water of each tank was  
584 calculated based on the cell density in the tank on that day, the relative abundance of the OTU  
585 in the tank on that day and the tank volume. For each OTU, this absolute abundance is compared  
586 to that of the previous day  $i-1$ . If there is on average an increase from day  $i-1$  to day  $i$  over all  
587 tanks, and this increase is observed in at least half of the tanks, this OTU is retained. The  
588 criterion is based on minimally half of the tanks in order to allow some biological variability,

589 since microbiomes from replicate aquaculture cultivations are known to be highly variable. For  
590 every OTU that was retained, the abundance in the sources that were added to the tank over  
591 the course of day  $i-1$  to day  $i$  are verified. If the OTU was present in a specific source, the  
592 absolute abundance that was added is calculated based on the cell density in the source that  
593 day, the relative abundance of the OTU in the source that day and the added volume of the  
594 source. If the absolute abundance that was added is greater than the absolute abundance that  
595 was already present in the tank on day  $i-1$ , this source is considered an important contributor  
596 of this OTU. Additionally, if the abundance on day  $i-1$  was zero, this OTU was tagged as a newly  
597 introduced by that source. Since the sampling resolution of the rearing water was 1 sample per  
598 day for 16S rRNA gene sequencing, this approach provides a snapshot of the effect of each  
599 source within 24 hours after the addition of the source. It should be noted that it is possible that  
600 much more OTUs entered the rearing water microbiome through the addition of this source  
601 initially, but these already decreased in abundance within 24 hours, and hence, they are not  
602 detected. It should be noted that for the *Artemia* cultures the source tracking analysis was  
603 performed using the community composition profiles of the *Artemia* storage water and not the  
604 *Artemia*-associated microbiome.

### 605 **Prediction of community assembly processes**

606 The framework proposed by Stegen *et al.* (2013) was used to determine the dominant  
607 community assembly processes in the rearing water. This model relies on phylogenetic and  
608 compositional turnover rates to quantitatively estimate influences of drift, selection and  
609 dispersal on community assembly, and is explained in detail in the Supplementary  
610 Experimental Procedures.

### 611 **Data availability**

612 The entire data-analysis pipeline is available as an R Markdown document at  
613 <https://github.com/jeheyse/SourceTrackingDynamicsShrimp>. Raw FCM data and metadata  
614 are available on FlowRepository under accession ID FR-FCM-Z2LM (on-site measurements)  
615 and ID FR-FCM-Z2LN (off-site measurements). Raw sequence data of the natural and mock  
616 communities are available from the NCBI Sequence Read Archive (SRA) under accession ID  
617 PRJNA637486.

## 618 **Acknowledgements**

619 We would like to thank Phuthongphan Rattayaporn and the ITARC staff for their assistance in  
620 the sampling and transport. We would like to thank Funda Torun for feedback on the  
621 manuscript and Tim Lacoere for his advice during the DNA extractions and for the design of  
622 Figure 1. JH is supported by the Flemish Fund for Scientific research (FWO-Vlaanderen, project  
623 1S80618N). RP is supported by a postdoctoral fellowship of the Flemish Fund for Scientific  
624 research (FWO-Vlaanderen). For this project, JH and RP received travel grants from The  
625 European Asian aquaculture Technology and innovation Platform (EURASTiP, grant IDs  
626 20180033 and 20180045).

## 627 **Contributions**

628 JH, RP, PK, PDS, GR, TD and NB conceived the study. JH, RP and PK performed the sampling  
629 campaign. JH and RP performed the lab work. JH analysed the data. JH, RP and NB interpreted  
630 the results and wrote the paper. NB supervised the findings of this work. All authors reviewed  
631 and approved the manuscript.

## 632 **Conflict of interest**

633 PK, PDS and GR are employed by INVE Aquaculture. The study was conducted in Thailand  
634 applying typical Thai backyard hatchery conditions under guidance of INVE people, as in kind

635 contribution. No other financial contributions to the study were made by INVE Aquaculture.

636 The other authors of this study declare no conflicts of interest.

## 637 References

- 638 Angthong, P., Uengwetwanit, T., Arayamethakorn, S., Chaitongsakul, P., Karoonuthaisiri, N., and Rungrassamee, W.  
639 (2020) Bacterial analysis in the early developmental stages of the black tiger shrimp (*Penaeus monodon*).  
640 *Sci. Rep.* **10**: 1–12.
- 641 Baker, L.J., Alegado, R.A., and Kemp, P.F. (2016) Response of diatom-associated bacteria to host growth state,  
642 nutrient concentrations, and viral host infection in a model system. *Environ. Microbiol. Rep.* **8**: 917–927.
- 643 Bakke, I., Coward, E., Andersen, T., and Vadstein, O. (2015) Selection in the host structures the microbiota  
644 associated with developing cod larvae (*Gadus morhua*). *Environ. Microbiol.* **17**: 3914–3924.
- 645 Bakke, I., Skjermo, J., Vo, T.A., and Vadstein, O. (2013) Live feed is not a major determinant of the microbiota  
646 associated with cod larvae (*Gadus morhua*). *Environ. Microbiol. Rep.* **5**: 537–548.
- 647 Baselga, A. and Orme, C.D.L. (2012) betapart: an R package for the study of beta diversity. *Methods Ecol. Evol.* **3**:  
648 808–812.
- 649 Behringer, G., Ochsenkühn, M.A., Fei, C., Fanning, J., Koester, J.A., and Amin, S.A. (2018) Bacterial Communities of  
650 Diatoms Display Strong Conservation Across Strains and Time. *Front. Microbiol.* **9**: 1–15.
- 651 Bentzon-tilia, M., Sonnenschein, E.C., and Gram, L. (2016) Monitoring and managing microbes in aquaculture –  
652 Towards a sustainable industry. *Microb. Biotechnol.* **9**: 576–584.
- 653 Bi, Z.X., Liu, Y.J., and Lu, C.P. (2007) Contribution of AhyR to virulence of *Aeromonas hydrophila* J-1. *Res. Vet. Sci.*  
654 **83**: 150–156.
- 655 Charoonnart, P. and Purton, S. (2018) Applications of Microalgal Biotechnology for Disease Control in Aquaculture.  
656 *Biology (Basel)*. **7**: 1–14.
- 657 Chen, W., Ng, T.H., Wu, J., Chen, J., and Wang, H. (2017) Microbiome Dynamics in a Shrimp Grow-out Pond with  
658 Possible Outbreak of Acute Hepatopancreatic Necrosis Disease. *Sci. Rep.* **7**: 1–12.
- 659 Chun, S., Cui, Y., Ahn, C., and Oh, H. (2018) Improving water quality using settleable microalga *Ettlia* sp. and the  
660 bacterial community in freshwater recirculating aquaculture system of *Danio rerio*. *Water Res.* **135**: 112–  
661 121.
- 662 Corre, V., Janeo, R.L., and Ronquillo, J. (2005) Use of greenwater technology as biocontrol of luminous bacteria in  
663 intensive shrimp (*Penaeus monodon*) grow out culture. *J. Nat. Sci.* **10**: 51–60.
- 664 Cottrell, R.S., Blanchard, J.L., Halpern, B.S., Metian, M., and Froehlich, H.E. (2020) Global adoption of novel  
665 aquaculture feeds could substantially reduce forage fish demand by 2030 Richard. *Nat. Food* **1**: 301–308.
- 666 Crenn, K., Duffieux, D., and Jeanthon, C. (2018) Bacterial Epibiotic Communities of Ubiquitous and Abundant  
667 Marine Diatoms Are Distinct in Short- and Long-Term Associations. *Front. Microbiol.* **9**: 1–12.
- 668 Dai, W., Sheng, Z., Chen, J., and Xiong, J. (2020) Shrimp disease progression increases the gut bacterial network  
669 complexity and abundances of keystone taxa. *Aquaculture* **517**: 1–8.
- 670 Dini-andreote, F. and Raaijmakers, J.M. (2018) Embracing Community Ecology in Plant Microbiome Research.  
671 *Trends Plant Sci.* **23**: 467–469.
- 672 Edgar, R.C., Haas, B.J., Clemente, J.C., Quince, C., and Knight, R. (2011) UCHIME improves sensitivity and speed of  
673 chimera detection. *Bioinformatics* **27**: 2194–2200.
- 674 Eisenhauer, N., Schulz, W., Scheu, S., and Jousset, A. (2013) Niche dimensionality links biodiversity and invasibility  
675 of microbial communities. *Funct. Ecol.* **27**: 282–288.
- 676 Fourquez, M., Obernosterer, I., Davies, D.M., Trull, T.W., and Blain, S. (2015) Microbial iron uptake in the naturally  
677 fertilized waters in the vicinity of the Kerguelen Islands: phytoplankton-bacteria interactions. *Biogeosciences*  
678 **12**: 1893–1906.
- 679 Fulbright, S.P., Robbins-pianka, A., Berg-lyons, D., Knight, R., Reardon, K.F., and Chisholm, S.T. (2018) Bacterial  
680 community changes in an industrial algae production system. *Algal Res.* **31**: 147–156.
- 681 Giatsis, C., Sipkema, D., Smidt, H., Heilig, H., Benvenuti, G., Verreth, J., and Verdegem, M. (2015) The impact of  
682 rearing environment on the development of gut microbiota in tilapia larvae. *Sci. Rep.* **5**: 1–15.
- 683 Goecke, F., Thiele, V., Wiese, J., Labes, A., and F. Imhoff, J. (2013) Algae as an important environment for bacteria -  
684 Phylogenetic relationships among new bacterial species isolated from algae. *Phycologia* **52**: 14–24.
- 685 Goulden, E.F., Høj, L., and Hall, M.R. (2013) Microbial management for bacterial pathogen control in invertebrate  
686 aquaculture hatcheries. In, *Advances in aquaculture hatchery technology*. Woodhead Publishing Limited, pp.  
687 246–285.
- 688 Hahne, F., LeMeur, N., Brinkman, R.R., Ellis, B., Haaland, P., Sarkar, D., et al. (2009) flowCore: a Bioconductor  
689 package for high throughput flow cytometry. *BMC Bioinformatics* **10**: 1–8.
- 690 Henke, J.M. and Bassler, B.L. (2004) Quorum Sensing Regulates Type III Secretion in *Vibrio harveyi* and *Vibrio*  
691 *parahaemolyticus*. *J. Bacteriol.* **186**: 3794–3805.
- 692 Høj, L., Bourne, D.G., and Hall, M.R. (2009) Localization, abundance and community structure of bacteria associated  
693 with *Artemia*: Effects of nauplii enrichment and antimicrobial treatment. *Aquaculture* **293**: 278–285.
- 694 Huang, Z., Zeng, S., Xiong, J., Hou, D., Zhou, R., Xing, C., et al. (2020) Microecological Koch's postulates reveal that

- 695 intestinal microbiota dysbiosis contributes to shrimp white feces syndrome. *Microbiome* **8**: 1–13.
- 696 Hurtado, L., Miranda, C.D., Rojas, R., Godoy, F.A., Añazco, M.A., and Romero, J. (2020) Live Feeds Used in the Larval  
697 Culture of Red Cusk Eel, *Genypterus chilensis*, Carry High Levels of Antimicrobial-Resistant Bacteria and  
698 Antibiotic-Resistance Genes (ARGs). *Animals* **10**: 1–23.
- 699 Interaminense, J.A., Ferreira Calazans, N., do Valle, B.C., Lyra Vogeley, J., Peixoto, S., and Soares, R. (2014) *Vibrio*  
700 spp. Control at Brine Shrimp, *Artemia*, Hatching and Enrichment. *J. World Aquac. Soc.* **45**: 65–74.
- 701 Jiang, L. and Patel, S.N. (2008) Community assembly in the presence of disturbance: a microcosm experiment.  
702 *Ecology* **89**: 1931–1940.
- 703 Jones, M.L., Ramoneda, J., Rivett, D.W., and Bell, T. (2017) Biotic resistance shapes the influence of propagule  
704 pressure on invasion success in bacterial communities. *Ecology* **98**: 1743–1749.
- 705 Kinnunen, M., Dechesne, A.D., Albrechtsen, H.J., and Smets, B.F. (2018) Stochastic processes govern invasion  
706 success in microbial communities when the invader is phylogenetically close to resident bacteria. *ISME J.* **12**:  
707 2748–2756.
- 708 Lahti, L. and Shetty, S. (2019) microbiome R package.
- 709 Lemire, A., Goudenège, D., Versigny, T., Petton, B., Calteau, A., Labreuche, Y., and Le Roux, F. (2015) Populations,  
710 not clones, are the unit of vibrio pathogenesis in naturally infected oysters. *ISME J.* **9**: 1523–1531.
- 711 Li, X., Zhou, L., Yu, Y., Ni, J., Xu, W., and Yan, Q. (2017) Composition of Gut Microbiota in the Gibel Carp (*Carassius*  
712 *auratus gibelio*) Varies with Host Development. *Microb. Ecol.* **74**: 239–249.
- 713 Li, Y., Chen, Y.-W., Xu, J.-K., Ding, W.-Y., Shao, A.-Q., Zhu, Y., et al. (2019) Temperature elevation and *Vibrio*  
714 *cyclitrophicus* infection reduce the diversity of haemolymph microbiome of the mussel *Mytilus coruscus*. *Sci.*  
715 *Rep.* **9**: 1–10.
- 716 Lopez-Torres, M.A. and Lizarraga-Partida, M.L. (2001) Bacteria isolated on TCBS media associated with hatched  
717 *Artemia* cysts of commercial brands. *Aquaculture* **194**: 11–20.
- 718 Lucas, R., Courties, C., Herbland, A., Gouletquer, P., Marteau, A.L., and Lemonnier, H. (2010) Eutrophication in a  
719 tropical pond: Understanding the bacterioplankton and phytoplankton dynamics during a vibriosis outbreak  
720 using flow cytometric analyses. *Aquaculture* **310**: 112–121.
- 721 Lundberg, D.S., Yourstone, S., Mieczkowski, P., Jones, C.D., and Dangl, J.L. (2013) Practical innovations for high-  
722 throughput amplicon sequencing. *Nat. Methods* **10**: 999–1002.
- 723 Lunestad, B.T., Nesse, L., Lassen, J., Svihus, B., Nesbakken, T., Fossum, K., et al. (2007) Salmonella in fish feed;  
724 occurrence and implications for fish and human health in Norway. *Aquaculture* **265**: 1–8.
- 725 Mallon, C.A., Poly, F., Le Roux, X., Marring, I., Van Elsas, J.D., and Falcao Salles, J. (2015) Resource pulses can alleviate  
726 the biodiversity – invasion relationship in soil microbial communities. *Ecology* **96**: 915–926.
- 727 Mcintosh, D., Ji, B., Forward, B.S., Puvanendran, V., Boyce, D., and Ritchie, R. (2008) Culture-independent  
728 characterization of the bacterial populations associated with cod (*Gadus morhua* L.) and live feed at an  
729 experimental hatchery facility using denaturing gradient gel electrophoresis. *Aquaculture* **275**: 42–50.
- 730 Mcmurdie, P.J. and Holmes, S. (2013) phyloseq: An R Package for Reproducible Interactive Analysis and Graphics  
731 of Microbiome Census Data. *PLoS One* **8**: 1–11.
- 732 Mills, M.M., Biogeochemistry, M., Kiel, D., Moore, C.M., Langlois, R., Biogeochemistry, M., et al. (2008) Nitrogen and  
733 phosphorus co-limitation of bacterial productivity and growth in the oligotrophic subtropical North Atlantic.  
734 *Limnol. Oceanogr.* **53**: 824–834.
- 735 Molina-cárdenas, C.A. and Sánchez-saavedra, M.P. (2017) Inhibitory effect of benthic diatom species on three  
736 aquaculture pathogenic vibrios. *Algal Res.* **27**: 131–139.
- 737 Mönnich, J., Tebben, J., Bergemann, J., Case, R., Wohlrab, S., and Harder, T. (2020) Niche-based assembly of bacterial  
738 consortia on the diatom *Thalassiosira rotula* is stable and reproducible. *ISME J.* **14**: 1614–1625.
- 739 Mühlenbruch, M. and Grossart, H. (2018) Mini-review: Phytoplankton-derived polysaccharides in the marine  
740 environment and their interactions with heterotrophic bacteria. *Environmenatal Microbiol.* **20**: 2671–2685.
- 741 Natrah, F.M.I., Bossier, P., Sorgeloos, P., Yusoff, F., and Defoirdt, T. (2014) Significance of microalgal-bacterial  
742 interactions for aquaculture. *Rev. Aquac.* **6**: 48–61.
- 743 Neori, A. (2011) “Green water” microalgae: the leading sector in world aquaculture. *J. Appl. Phycol.* **23**: 143–149.
- 744 O’Keefe, T. and Campabadal, C.A. (2015) Storage and handling of feeds for fish and shrimp.
- 745 Oksanen, J., Blanchet, F.G., Friendly, M., Kindt, R., Legendre, P., McGlinn, D., et al. (2019) vegan: Community Ecology  
746 Package.
- 747 Park, B.S., Lee, M., Shin, K., and Baek, S.H. (2020) Response of the bacterioplankton composition to inorganic  
748 nutrient loading and phytoplankton in southern Korean coastal waters: A mesocosm study. *Mar. Ecol.* **41**: 1–  
749 14.
- 750 Payne, M.S., Hall, M.R., Bannister, R., Sly, L., and Bourne, D.G. (2006) Microbial diversity within the water column  
751 of a larval rearing system for the ornate rock lobster (*Panulirus ornatus*). *Aquaculture* **258**: 80–90.
- 752 Pearson, D.E., Ortega, Y.K., Eren, Ö., and Hierro, J.L. (2018) Community Assembly Theory as a Framework for  
753 Biological Invasions. *Trends Ecol. Evol.* **33**: 313–325.
- 754 Pinhassi, J., Havskum, H., Peters, F., and Malits, A. (2004) Changes in Bacterioplankton Composition under Different  
755 Phytoplankton Regimens. **70**: 6753–6766.



- 756 Props, R., Kerckhof, F.-M., Rubbens, P., De Vrieze, J., Hernandez-Sanabria, E., Waegeman, W., et al. (2017) Absolute  
757 quantification of microbial taxon abundances. *ISME J.* **11**: 584–587.
- 758 R Core Team (2017) R: A Language and Environment for Statistical Computing. *R Found. Stat. Comput.*
- 759 Rita, A., Alves, M., Domingues, I., and Henriques, I. (2019) The impact of antibiotic exposure in water and zebra fish  
760 gut microbiomes: A 16S rRNA gene-based metagenomic analysis. *Ecotoxicol. Environ. Saf.* **186**: 1–10.
- 761 Santillan, E., Seshan, H., Constancias, F., Drautz-Moses, D.I., and Wuertz, S. (2018) Frequency of disturbance alters  
762 diversity, function, and underlying assembly mechanisms of complex bacterial communities. *npj Biofilms*  
763 *Microbiomes* **5**: 1–9.
- 764 Schloss, P.D., Westcott, S.L., Ryabin, T., Hall, J.R., Hartmann, M., Hollister, E.B., et al. (2009) Introducing mothur:  
765 Open-Source , Platform-Independent , Community-Supported Software for Describing and Comparing  
766 Microbial Communities. *Appl. Environ. Microbiol.* **75**: 7537–7541.
- 767 Schmidt, V., Gomez-Chiarri, M., Roy, C., Smith, K., and Amaral-Zettler, L. (2017) Subtle Microbiome Manipulation  
768 Using Probiotics Reduces Antibiotic-Associated Mortality in Fish. *mSystems* **2**: 1–13.
- 769 De Schryver, P. and Vadstein, O. (2014) Ecological theory as a foundation to control pathogenic invasion in  
770 aquaculture. *ISME J.* **8**: 2360–2368.
- 771 Shinn, A.P., Pratoomyot, J., Griffiths, D., Trong, T.Q., Vu, N.T., Jiravanichpaisal, P., and Briggs, M. (2018) Asian Shrimp  
772 Production and the Economic Costs of Disease. *Asian Fish. Sci.* **31**: 29–58.
- 773 Smriga, S., Fernandez, V.I., Mitchell, J.G., and Stocker, R. (2016) Chemotaxis toward phytoplankton drives organic  
774 matter partitioning among marine bacteria. *PNAS* **113**: 1576–1581.
- 775 Stegen, J.C., Lin, X., Fredrickson, J.K., Chen, X., Kennedy, D.W., Murray, C.J., et al. (2013) Quantifying community  
776 assembly processes and identifying features that impose them. *ISME J.* **7**: 2069–2079.
- 777 Stentiford, G.D., Sritunyalucksana, K., Flegel, T.W., Bryony, A., Williams, P., Withyachumnarnkul, B., et al. (2017)  
778 New Paradigms to Help Solve the Global Aquaculture Disease Crisis. *PLoS Pathog.* **13**: 1–6.
- 779 Sun, F., Wang, Y., Wang, C., Zhang, L., Tu, K., and Zheng, Z. (2019) Insights into the intestinal microbiota of several  
780 aquatic organisms and association with the surrounding environment. *Aquaculture* **507**: 196–202.
- 781 Tang, Y., Wang, R., Tan, L., Guo, L., Duan, Y., Yang, L., and Jiang, S. (2020) Effects of live microalgae and algae powder  
782 on microbial community, survival, metamorphosis and digestive enzyme activity of *Penaeus monodon* larvae  
783 at different growth stages. *Aquaculture* **526**: 1–12.
- 784 Teeling, H., Fuchs, B.M., Bennke, C.M., Kru, K., Chafee, M., Kappelmann, L., et al. (2016) Recurring patterns in  
785 bacterioplankton dynamics during coastal spring algae blooms. *Elife* **5**: 1–31.
- 786 Thompson, F.L., Thompson, C.C., Roque, A., and Swings, J. (2004) *Vibrio hispanicus* sp. nov., isolated from *Artemia*  
787 sp. and sea water in Spain. *Int. J. Syst. Evol. Microbiol.* **54**: 261–265.
- 788 Tkavc, R., Ausec, L., Oren, A., and Gunde-cimerman, N. (2011) Bacteria associated with *Artemia* spp. along the  
789 salinity gradient of the solar salterns at Eilat (Israel). *FEMS Microbiol. Ecol.* **77**: 310–321.
- 790 Turgay, E., Steinum, T.M., Eryalc, K.M., and Yardımcı, R.E. (2020) The influence of diet on the microbiota of live-  
791 feed rotifers (*Brachionus plicatilis*) used in commercial fish larviculture. *FEMS Microbiol. Lett.* **367**: 1–9.
- 792 Vadstein, O., Attramadal, K.J.K., Bakke, I., Forberg, T., Olsen, Y., Verdegem, M., et al. (2018) Managing the microbial  
793 community of marine fish larvae: A holistic perspective for larviculture. *Front. Microbiol.* **9**: 1–22.
- 794 Vestrum, R.I., Luef, B., Forberg, T., Bakke, I., and Vadstein, O. (2018) Investigating Fish Larvae-Microbe Interactions  
795 in the 21st Century: Old Questions Studied with New Tools. In, *Emerging Issues in Fish Larvae Research.*, pp.  
796 1–36.
- 797 Walburn, J.W., Wemheuer, B., Thomas, T., Copeland, E., Connor, W.O., Booth, M., et al. (2019) Diet and diet-  
798 associated bacteria shape early microbiome development in Yellowtail King fish (*Seriola lalandi*). *Microb.*  
799 *Biotechnol.* **12**: 275–288.
- 800 Wiborg, S., Bakke, I., Birkeland, M., Nordøy, K., Dalum, A.S., and Attramadal, K.J.K. (2020) Production of lump fish  
801 (*Cyclopterus lumpus* L.) in RAS with distinct water treatments: Effects on fish survival, growth, gill health  
802 and microbial communities in rearing water and biofilm. *Aquaculture* **522**: 1–13.
- 803 Xiong, J., Xuan, L., and Yu, W. (2019) Spatiotemporal successions of shrimp gut microbial colonization: high  
804 consistency despite distinct species pool. *Environ. Microbiol.* **21**: 1383–1394.
- 805 Xiong, J., Zhu, J., Wang, K., and Wang, X. (2014) The Temporal Scaling of Bacterioplankton Composition: High  
806 Turnover and Predictability during Shrimp Cultivation. *Microbiol. Aquat. Syst.* **67**: 256–264.
- 807 Xiong, J., Zhu, J., and Zhang, D. (2014) The application of bacterial indicator phylotypes to predict shrimp health  
808 status. *Appl. Microbiol. Biotechnol.* **98**: 8291–8299.
- 809 Yan, M., Zhang, X., Hu, L., and Huang, X. (2020) Bacterial Community Dynamics During Nursery Rearing of Pacific  
810 White Shrimp (*Litopenaeus vannamei*) Revealed via High-Throughput Sequencing. *Indian J. Microbiol.* **60**:  
811 214–221.
- 812 Yan, Q., Li, J., Yu, Y., Wang, J., He, Z., Nostrand, J.D. Van, et al. (2016) Environmental filtering decreases with fish  
813 development for the assembly of gut microbiota. *Environ. Microbiol.* **18**: 4739–4754.
- 814 Yang, W., Zheng, C., Zheng, Z., Wei, Y., Lu, K., and Zhu, J. (2018) Nutrient enrichment during shrimp cultivation alters  
815 bacterioplankton assemblies and destroys community stability. *Ecotoxicol. Environ. Saf.* **156**: 366–374.
- 816 Yang, W., Zheng, Z., Lu, K., Zheng, C., Du, Y., and Wang, J. (2020) Manipulating the phytoplankton community has

- 817 the potential to create a stable bacterioplankton community in a shrimp rearing environment. *Aquaculture*  
818 **520**: 1–10.
- 819 Zhang, M., Sun, K., and Sun, L. (2008) Regulation of autoinducer 2 production and luxS expression in a pathogenic  
820 *Edwardsiella tarda* strain. *Microbiology* **154**: 2060–2069.
- 821 Zhang, Z., Li, D., Xu, W., Tang, R., and Li, L. (2019) Microbiome of Co-cultured Fish Exhibits Host Selection and Niche  
822 Differentiation at the Organ Scale. *Front. Microbiol.* **10**: 1–11.
- 823 Zheng, Y., Yu, Min, Liu, J., Qiao, Y., Wang, L., Li, Z., et al. (2017) Bacterial community associated with healthy and  
824 diseased Pacific white shrimp (*Litopenaeus vannamei*) larvae and rearing water across different growth  
825 stages. *Front. Microbiol.* **8**: 1–11.
- 826 Zhou, J., Deng, Y., Zhang, P., Xue, K., Liang, Y., Nostrand, J.D. Van, et al. (2014) Stochasticity, succession, and  
827 environmental perturbations in a fluidic ecosystem. *PNAS* **11**: 836–845.
- 828 Zhou, J. and Ning, D. (2017) Stochastic Community Assembly: Does It Matter in Microbial Ecology? *Microbiol. Mol.*  
829 *Biol. Rev.* **81**: 1–32.
- 830

## 831 **Figure legends**

832 Figure 1 – Overview of the experimental setup. Five replicate *Litopenaeus vannamei* larviculture  
833 tanks and all sources that were expected to contribute to the rearing water microbiome,  
834 including five dry feeds, *Artemia*, algae and exchange water, were monitored over 18 days (life  
835 stages N5 to PL10). The upper part of the figure illustrates the timing of addition for each of the  
836 external sources to the rearing water. For the dry feeds different shades of brown were used  
837 for the different products.

838 Figure 2 - Temporal dynamics of the rearing water bacterial densities (A) and community  
839 composition (B) of the five replicate tanks. The OTUs belonging to the 15 most abundant genera  
840 are coloured, all other genera were labelled with “Other”. The community composition for tank  
841 2 on day 6 is missing since this sample was not taken.

842 Figure 3 – (A) PCoA ordination of the Bray-Curtis dissimilarities of the rearing water  
843 microbiomes. Dots are coloured according to the different tanks and the size corresponds to  
844 the number of days after the start of the cultivation. (B) Dynamics of the individual Bray-Curtis  
845 dissimilarities of each tank compared to the other tanks, per day (e.g. the line of T1 gives the  
846 average Bray-Curtis dissimilarities of T1 as compared to the 4 other tanks, per day). (C) Average  
847 Bray-Curtis dissimilarities between the 5 tanks, per day, and split according to turnover (i.e.  
848 differences in absence/presence of taxa) and abundance variation (i.e. differences in the  
849 relative abundances between the tanks). Turnover was responsible for 0.26 % of the  
850 dissimilarity on average, and is therefore not visible on the graph.

851 Figure 4 – Temporal dynamics of the bacterial abundances in the algal cultures (A), exchange  
852 water (B) and *Artemia* storage tanks (C). The different background-colours correspond to the  
853 different batches, and the lines connect samples that originated from the same batch. Note that  
854 the scale from panel B differs from those of panel A and C.

855 Figure 5 – (A) Results of the source tracking analysis based absolute OTU abundances in the  
856 rearing water and in the sources. Every dot corresponds to an introduction through one of the  
857 peripheral microbiomes. OTUs that are enriched through the source are indicated with a dot,  
858 OTUs that are newly introduced are indicated with a rhombus. The size of the symbol  
859 corresponds to the  $\log_2(\text{fold change})$  in absolute OTU abundance that was caused on the day  
860 before the introduction as compared to the day after the introduction. In case of a newly  
861 introduced OTU, the fold change was calculated based on the absolute abundance of the OTU  
862 that had been introduced through the source as compared to the day after the introduction. (B)  
863 Relative abundance of the introduced OTUs in the source microbiomes from which they  
864 originated. An OTU that was introduced multiple times has multiple dots. (C) Number of days  
865 the OTU was present in the rearing water microbiomes after introduction. There is a separate  
866 dot for each tank, as the residence time of the OTU sometimes differed between the tanks. OTUs  
867 that were introduced multiple times have multiple residence times per tank. Dots may overlap.  
868 (D) Relative abundance that the OTUs reach in the rearing water after introduction. Every dot  
869 corresponds to the relative abundance of this OTU in one tank on one day.

870 Figure 6 – Distribution of the dominant community assembly processes for the individual tanks  
871 (A) and from the sources to the rearing water (B), as predicted using the framework of Stegen  
872 *et al.* (2013). The blue processes represent the stochastic assembly mechanisms, the yellow  
873 processes represent selective mechanisms. Note that both figures have a separate color scale.

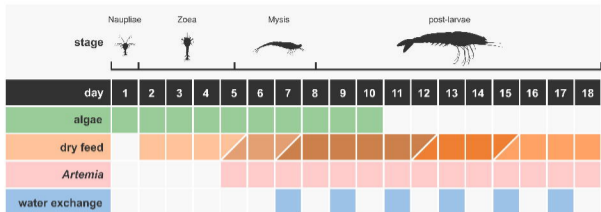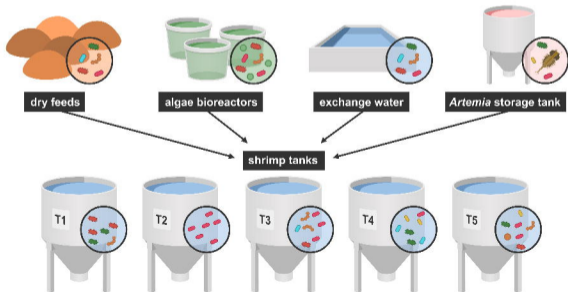

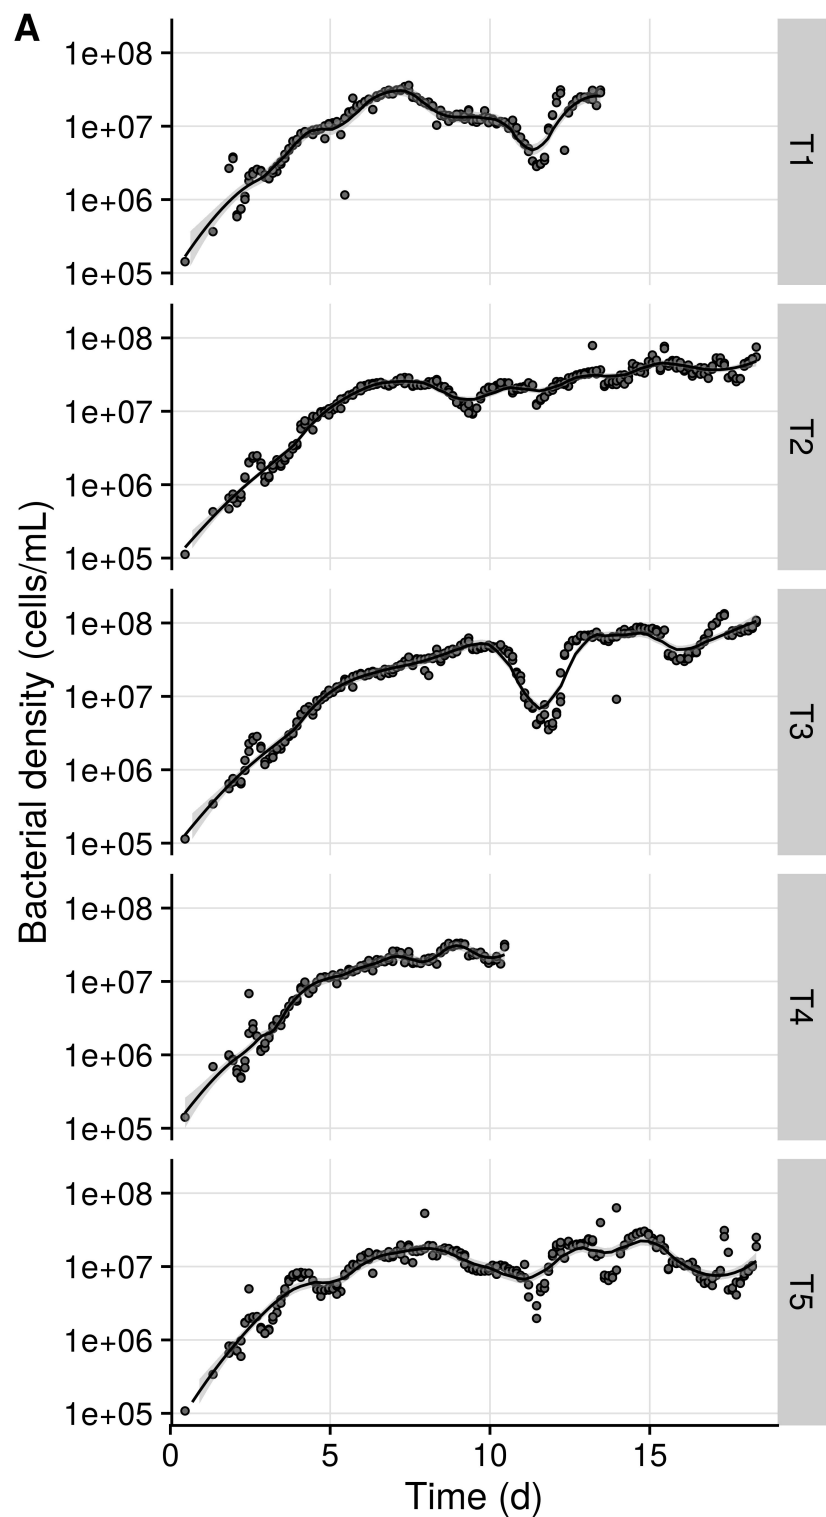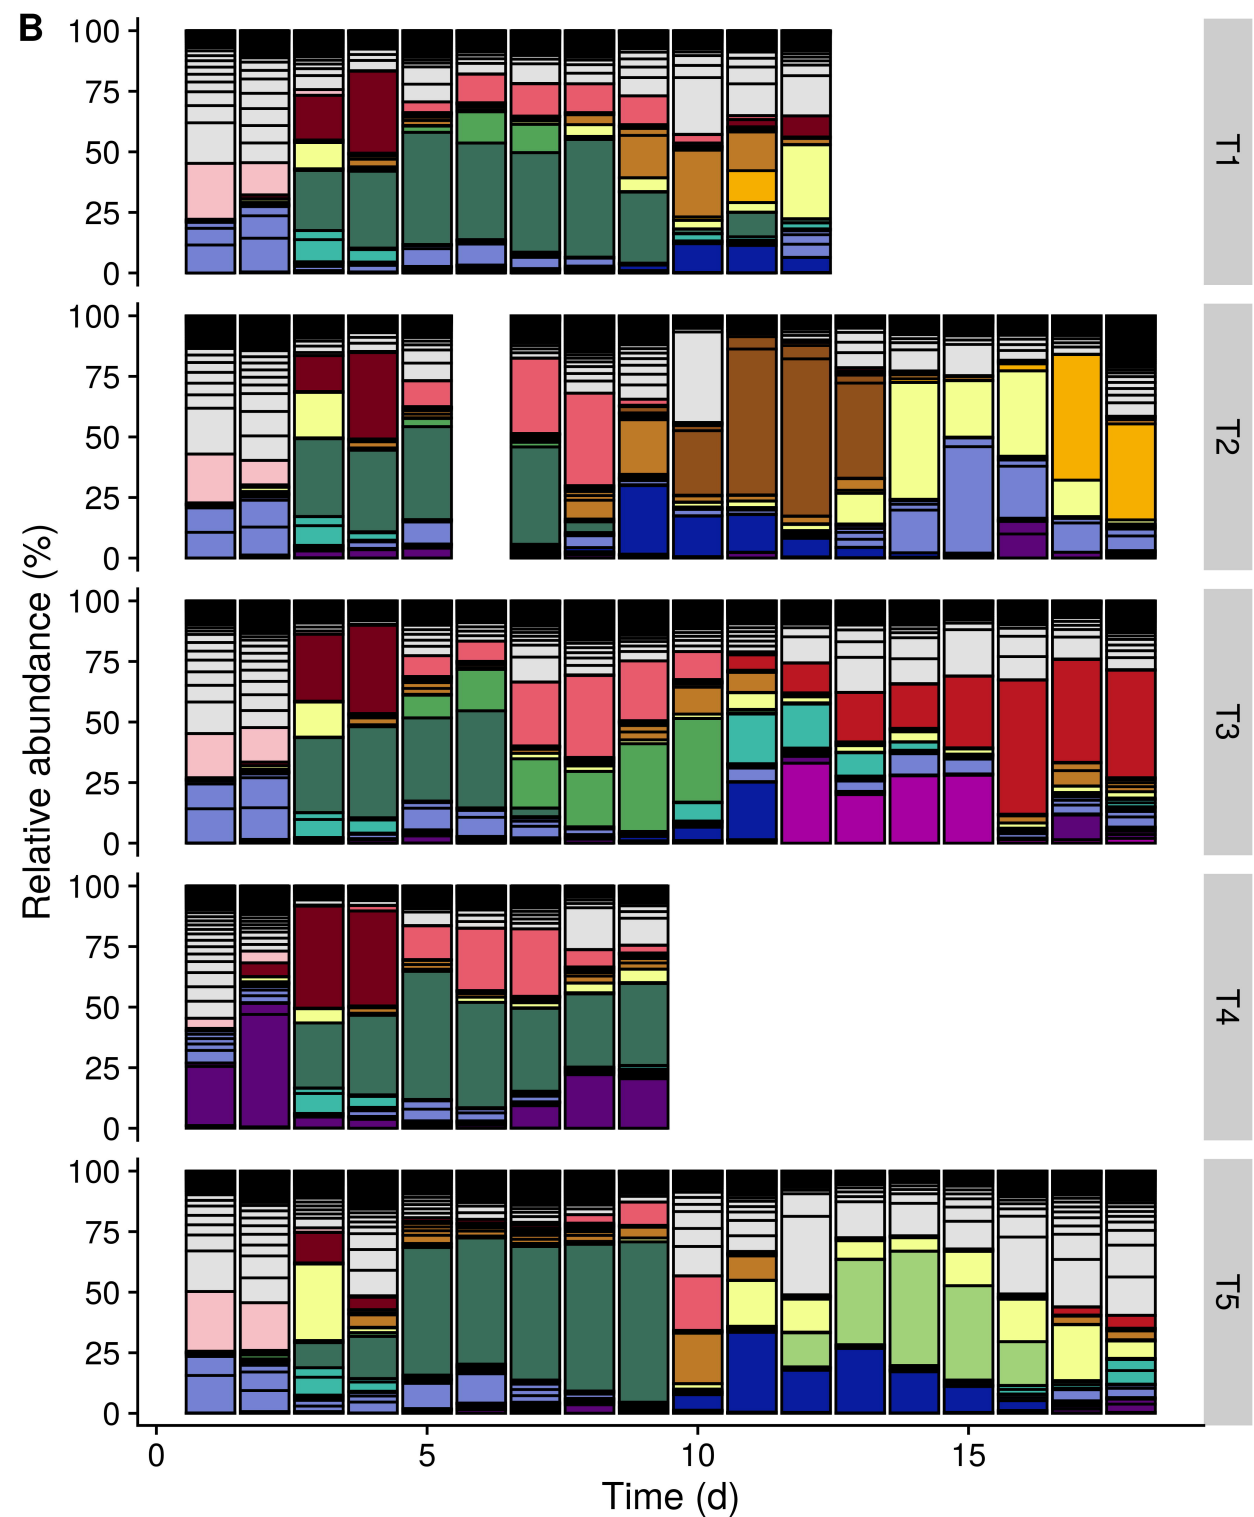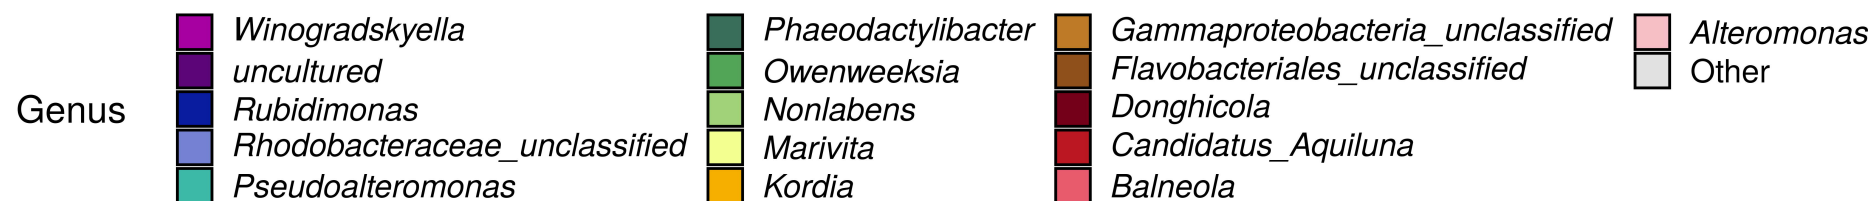

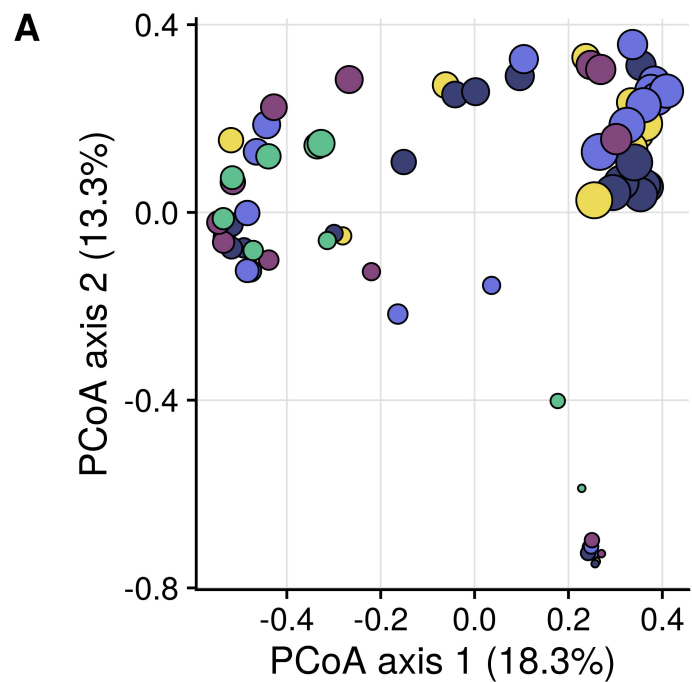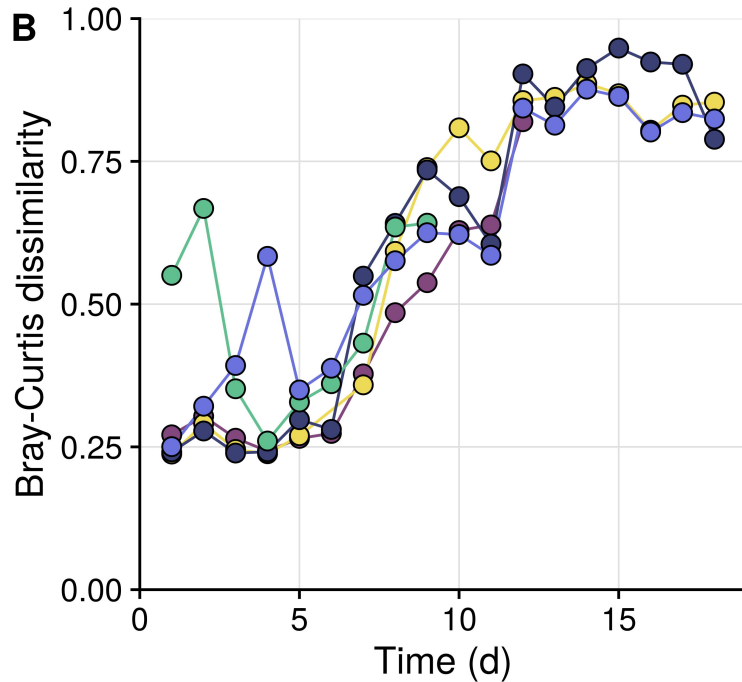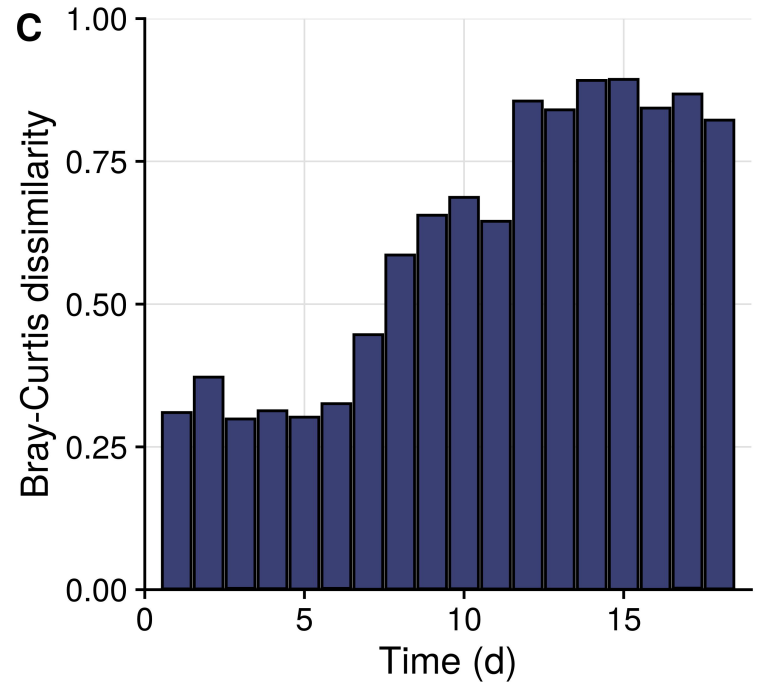

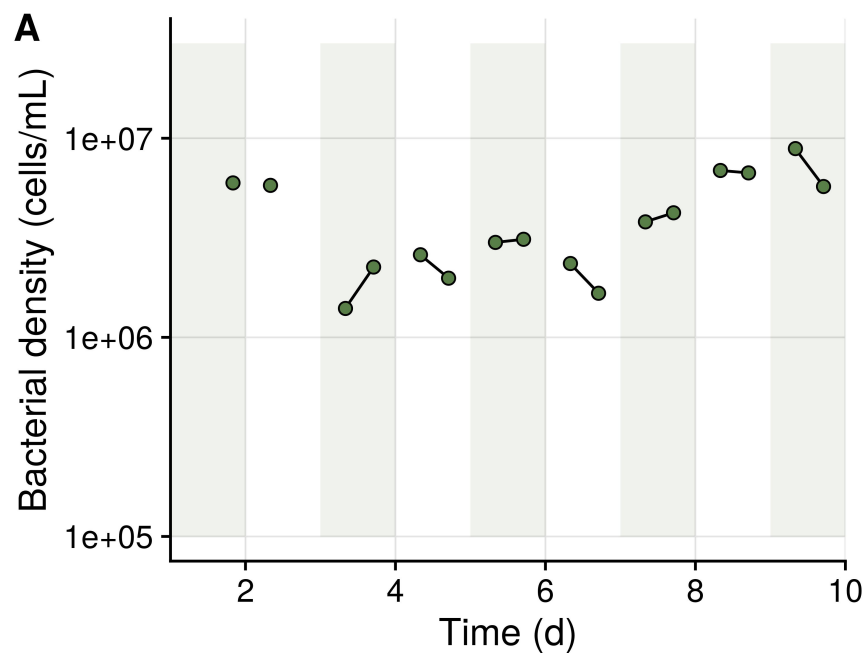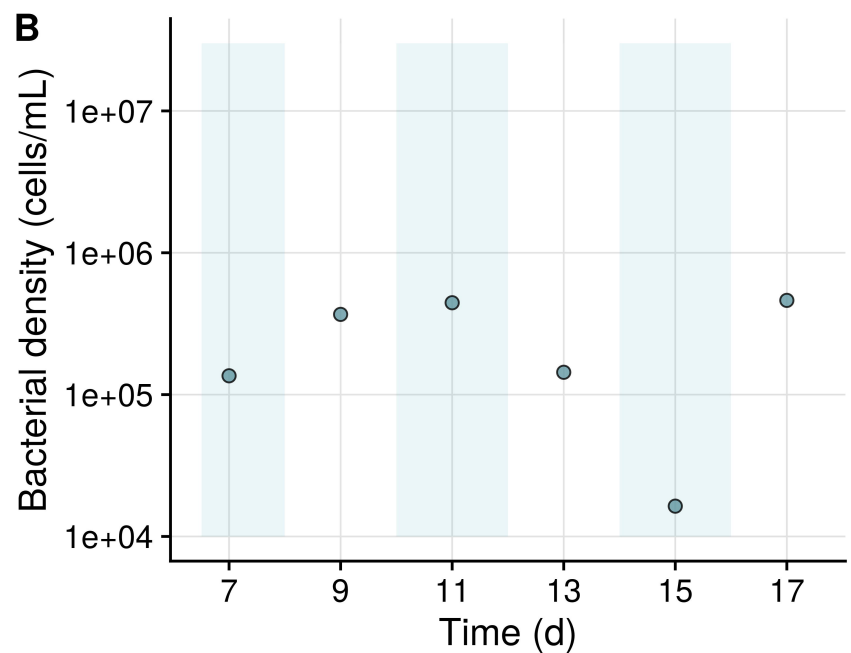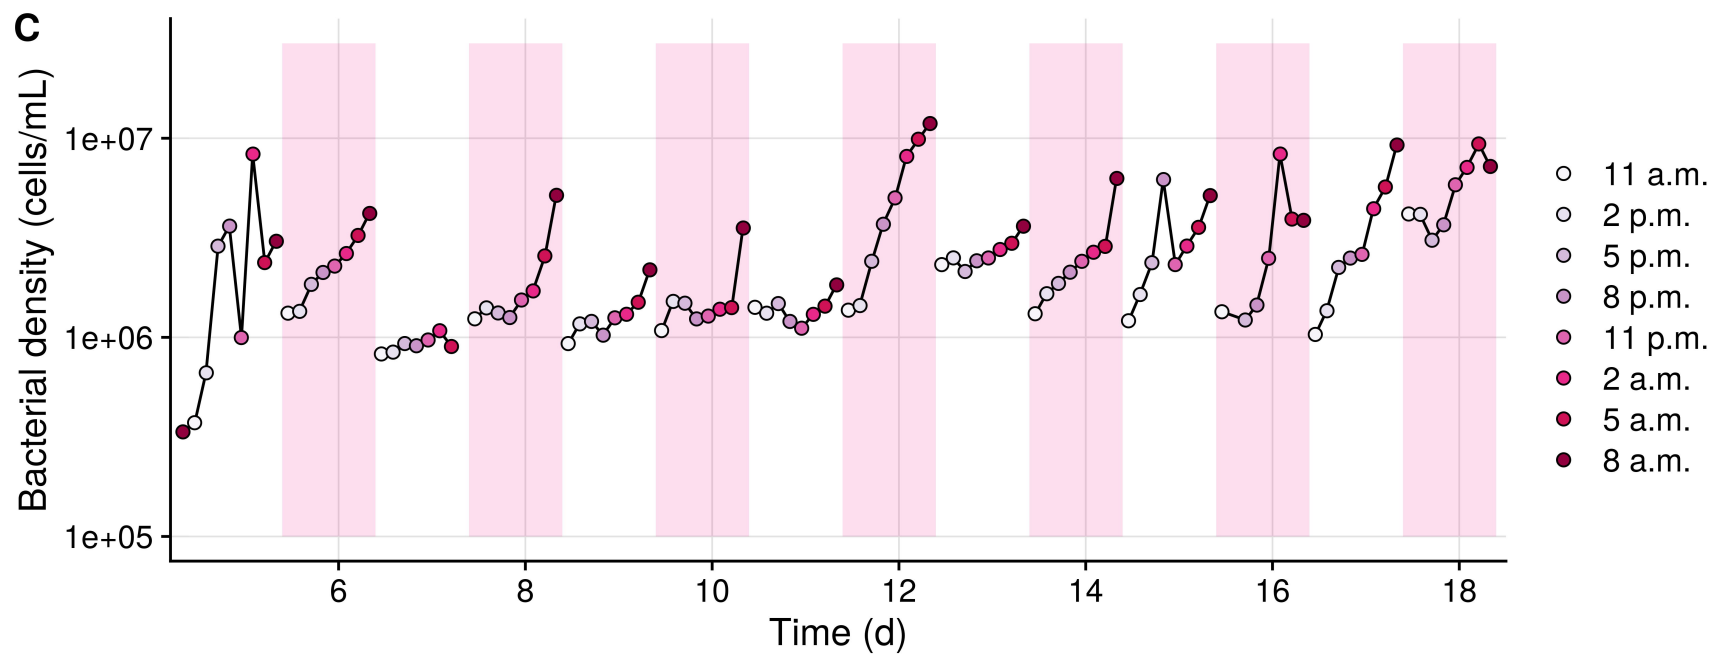



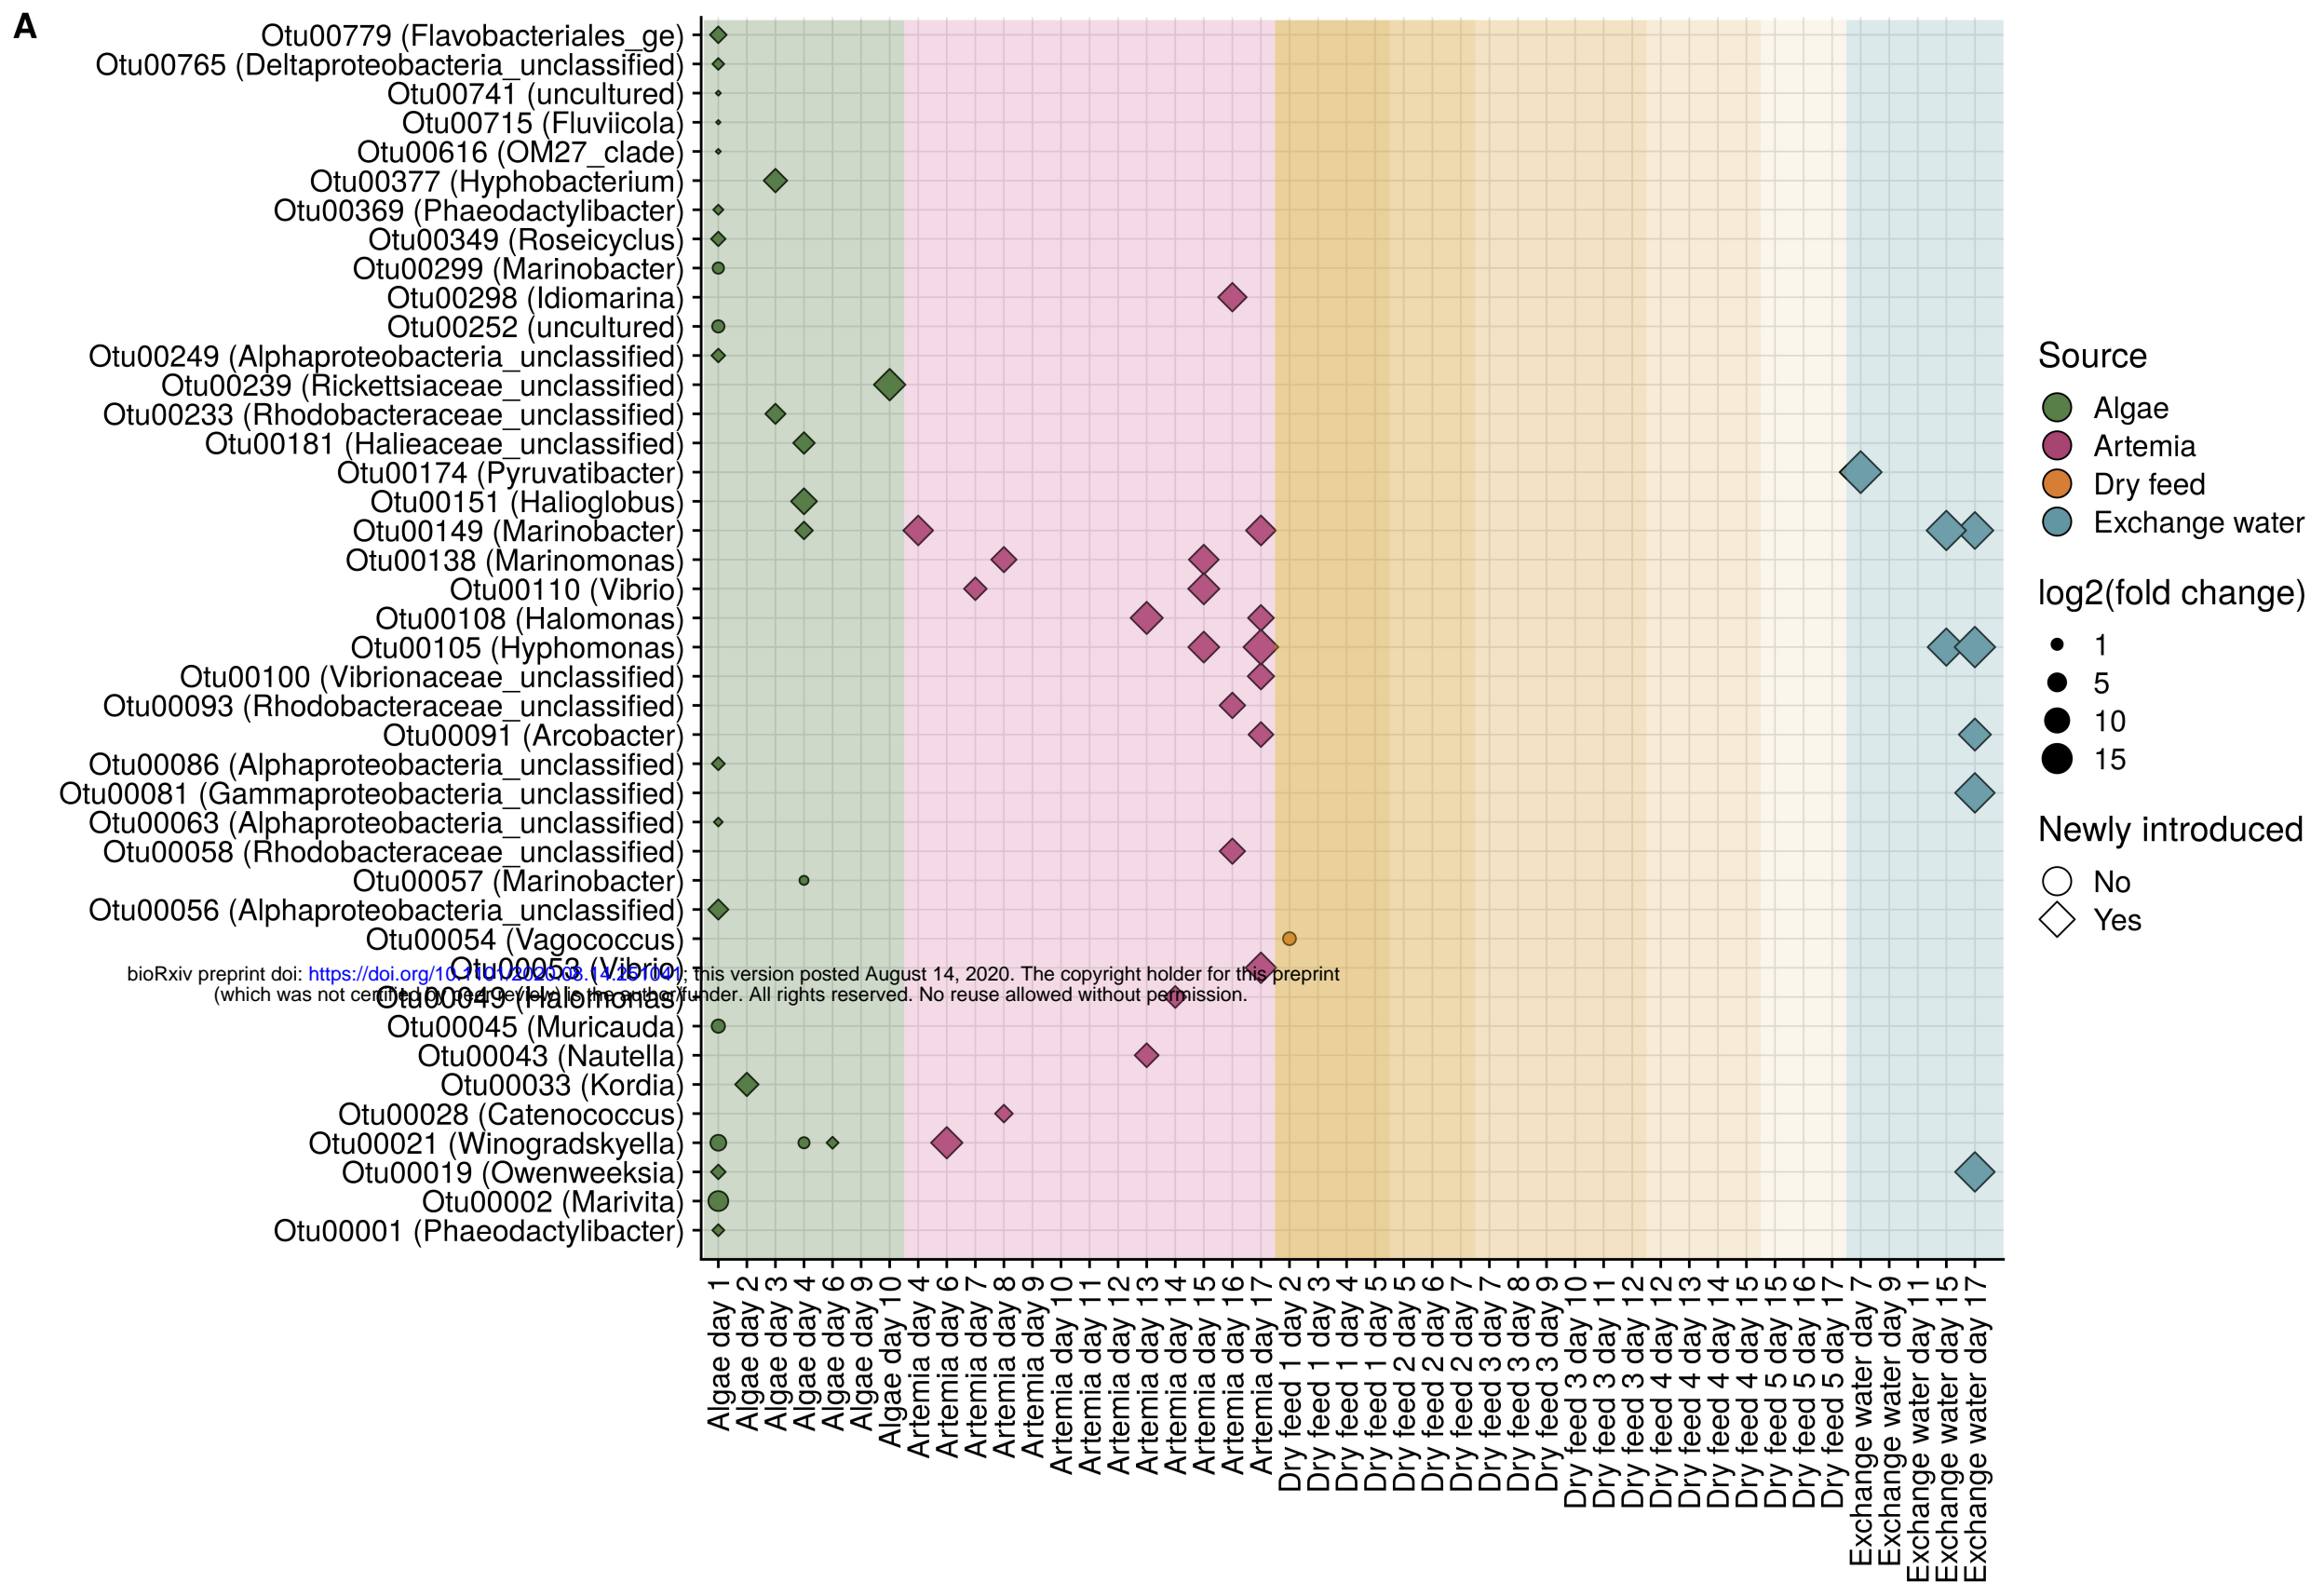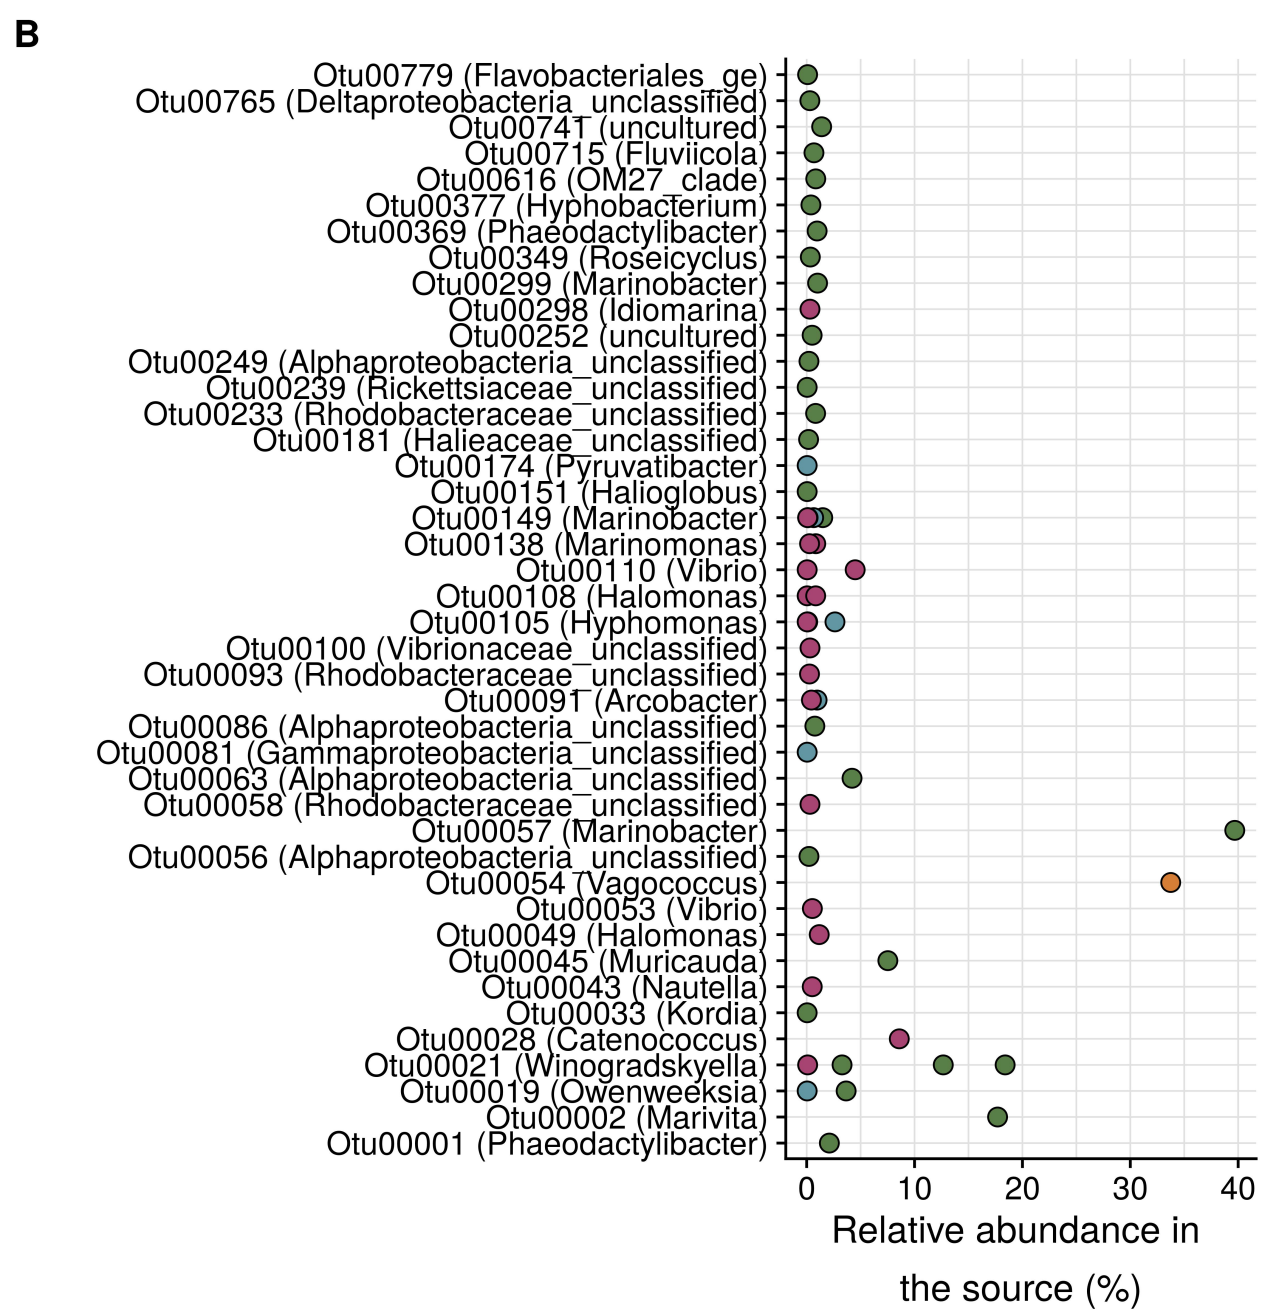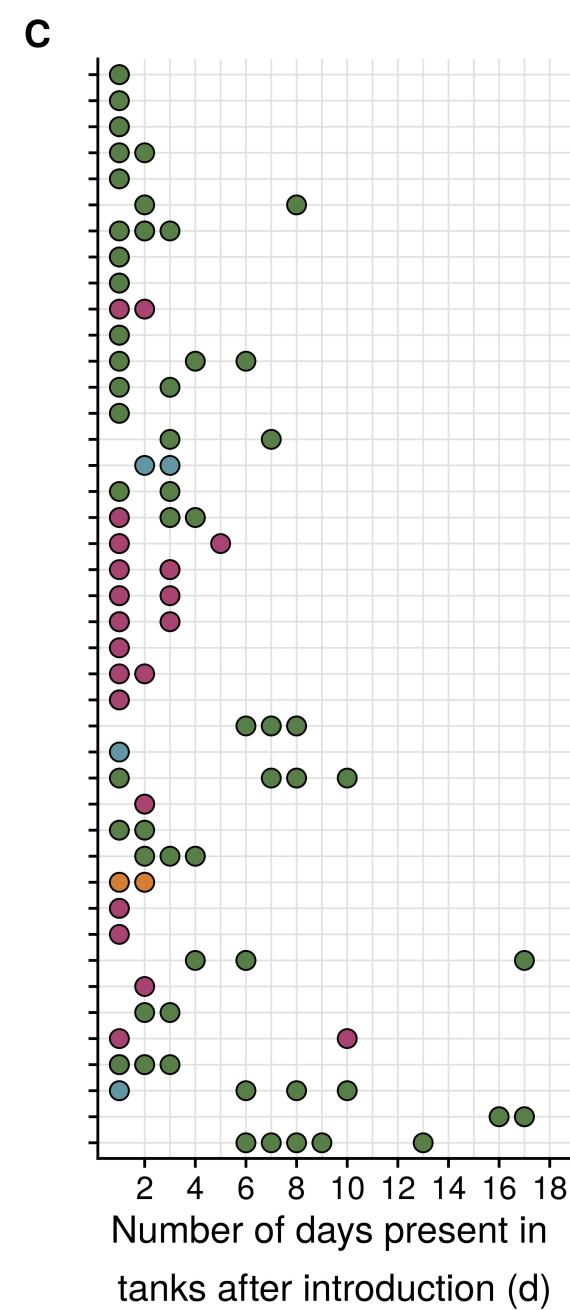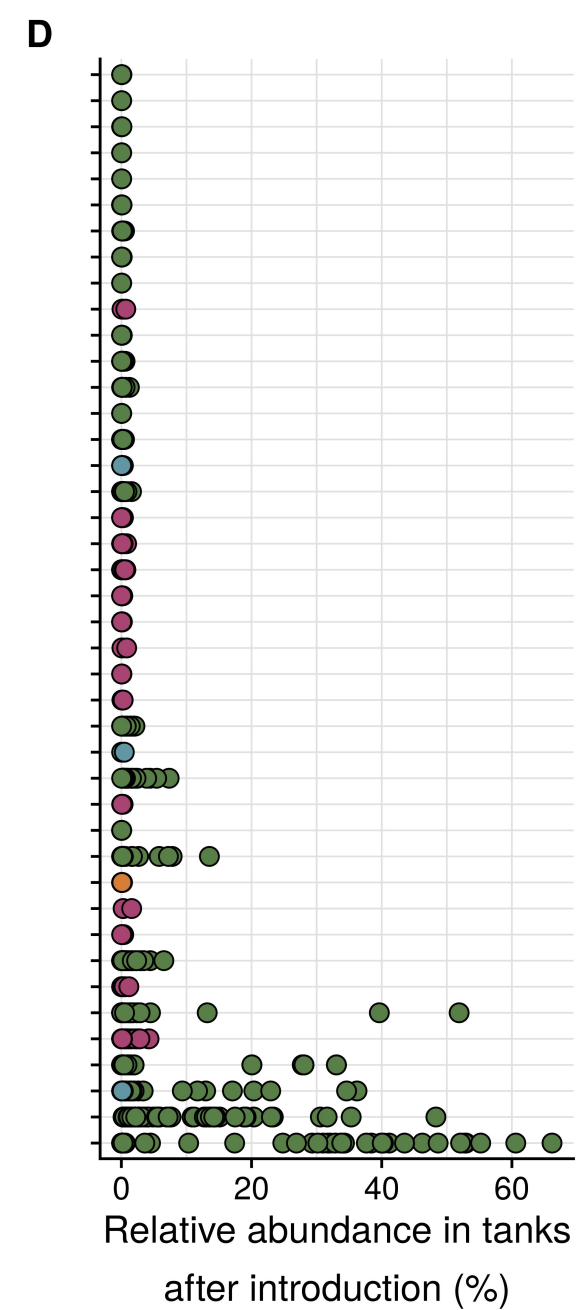

Source ● Algae ● Artemia ● Exchange water ● Dry feed

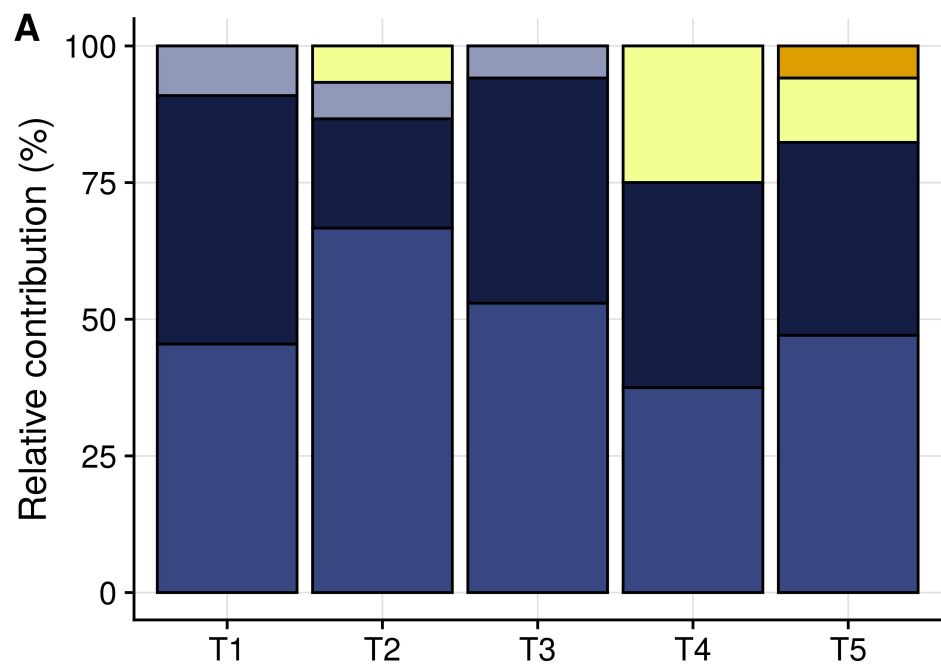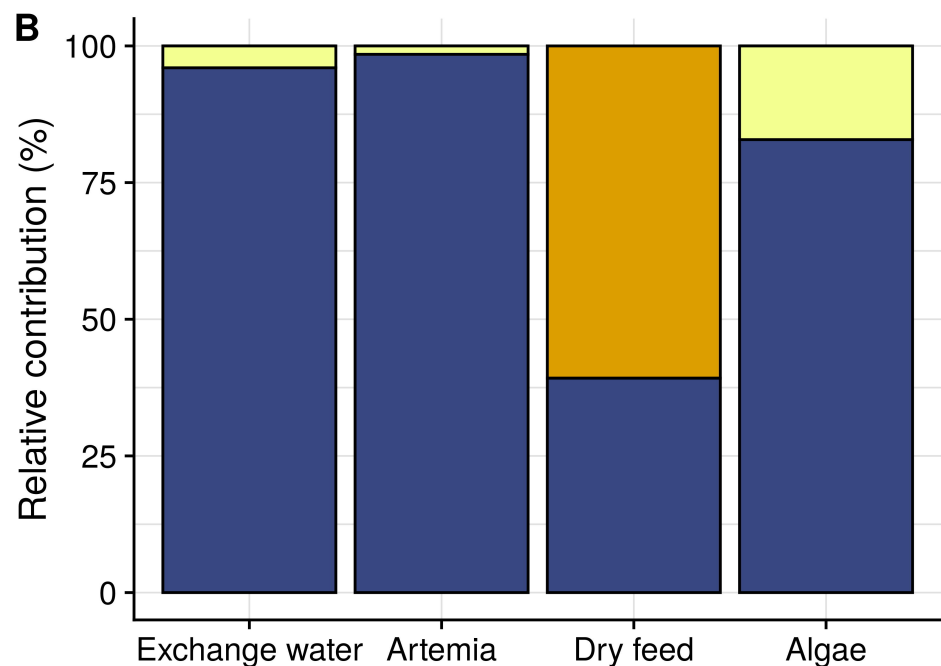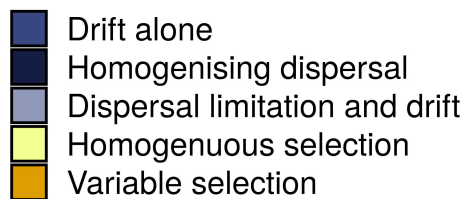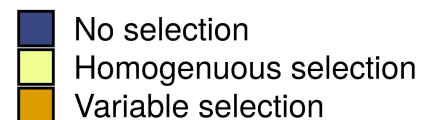

Source: https://www.biorxiv.org/content/biorxiv/early/2020/08/14/2020.08.14.251041.full.pdf
